# Supplementary material for: N-methyl Benzimidazole Tethered Cholic Acid Amphiphiles Can Eradicate S. aureus-Mediated Biofilms and Wound Infections
Source: MDPI journal article supplement (doi:10.3390/molecules27113501), 2022-05-30
Supplement: s1 [file s1]

## Supporting Information

# N-methyl Benzimidazole Tethered Cholic Acid Amphiphiles Can Eradicate *S. aureus*-Mediated Biofilms and Wound Infections

Himanshu Kakkar <sup>1</sup>, Nalini Chaudhary <sup>2</sup>, Devashish Mehta <sup>2</sup>, Varsha Saini <sup>2</sup>, Shallu Maheshwari <sup>1</sup>, Jitender Singh <sup>1</sup>, PreetiWalia <sup>2,\*</sup> and Avinash Bajaj <sup>2,\*</sup>

<sup>1</sup> Lord Shiva College of Pharmacy, Near Civil Hospital, Sirsa 125055, Haryana, India; himanshukakkar1670@gmail.com (H.K.); shallumaheshwari180@gmail.com (S.M.); saggujittu@gmail.com (J.S.)

<sup>2</sup> Laboratory of Nanotechnology and Chemical Biology, Regional Centre for Biotechnology, NCR Biotech Science Cluster, 3rd Milestone, Faridabad-Gurgaon Expressway, Faridabad 121001, Haryana, India; nalinichaudhary2311@gmail.com (N.C.); devashish.mehta@rcb.res.in (D.M.); varsha.phd19@rcb.res.in (V.S.)

\* Correspondence: preetiwalia\_chem@yahoo.com (P.W.); bajaj@rcb.res.in (A.B.)

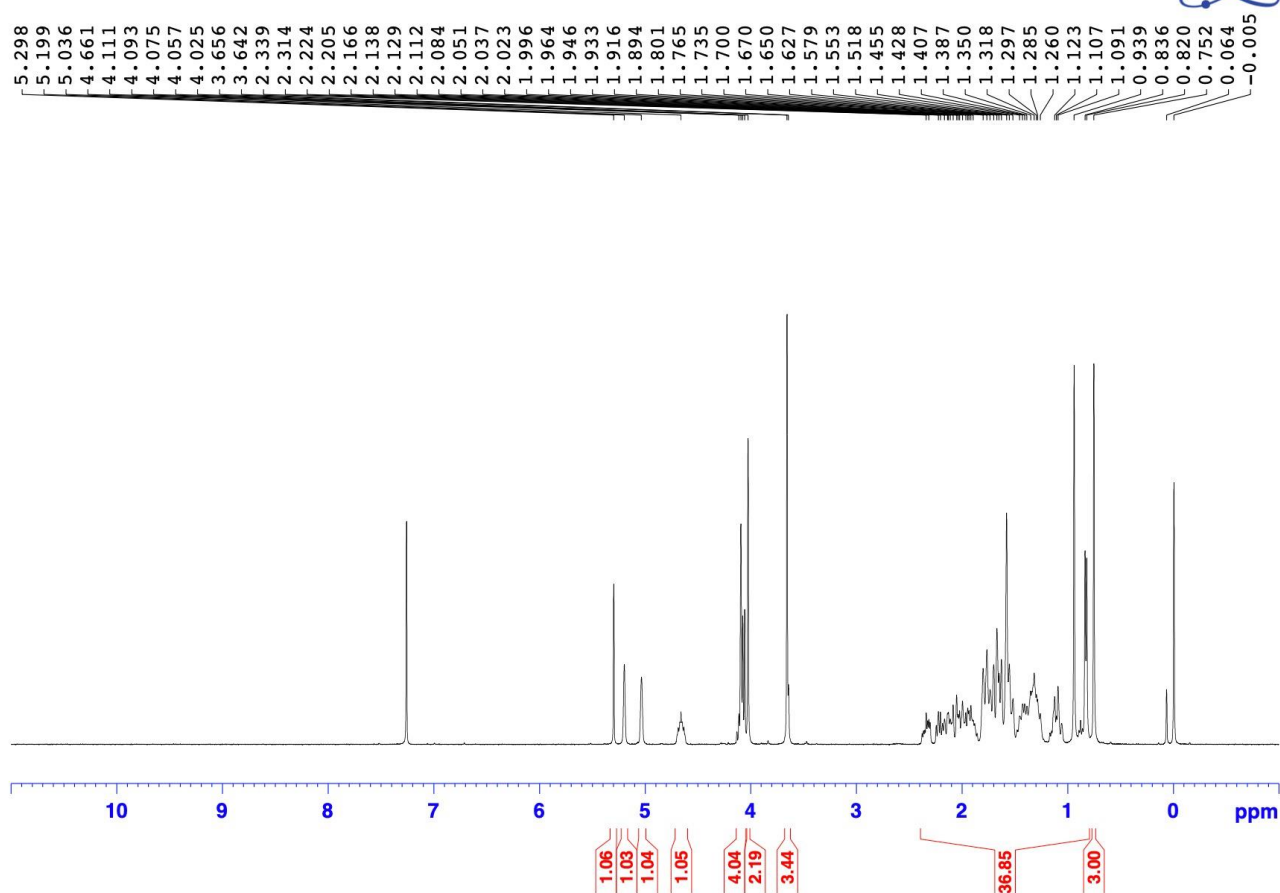

Figure S1. <sup>1</sup>H NMR spectrum of 11a.

Ca-Ethyl-AcCl3

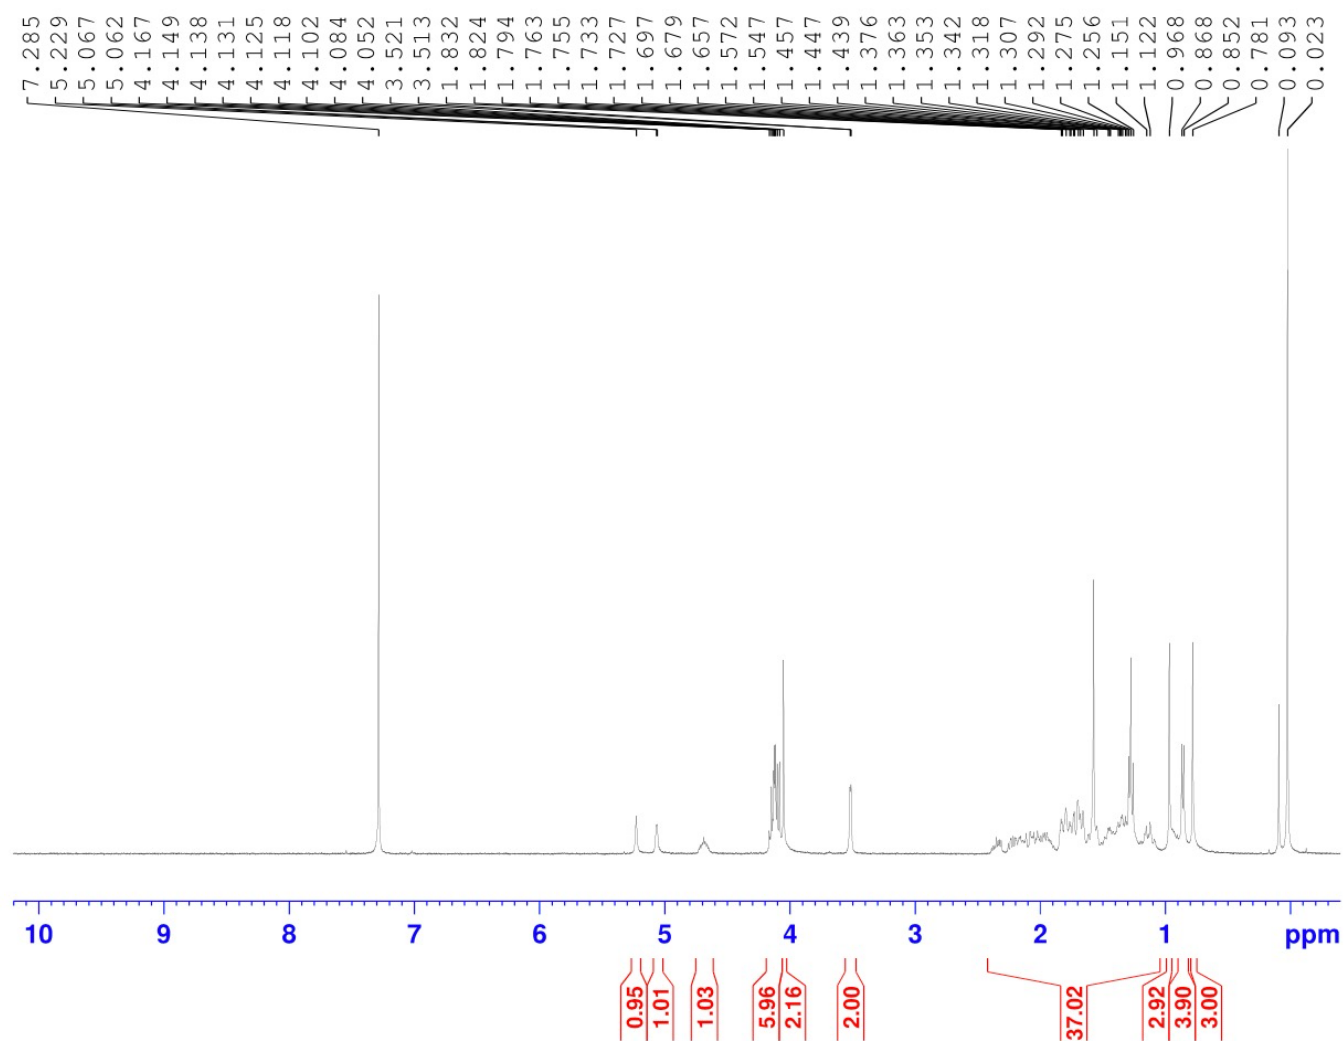

Figure S2.  $^1\text{H}$  NMR spectrum of **11b**.

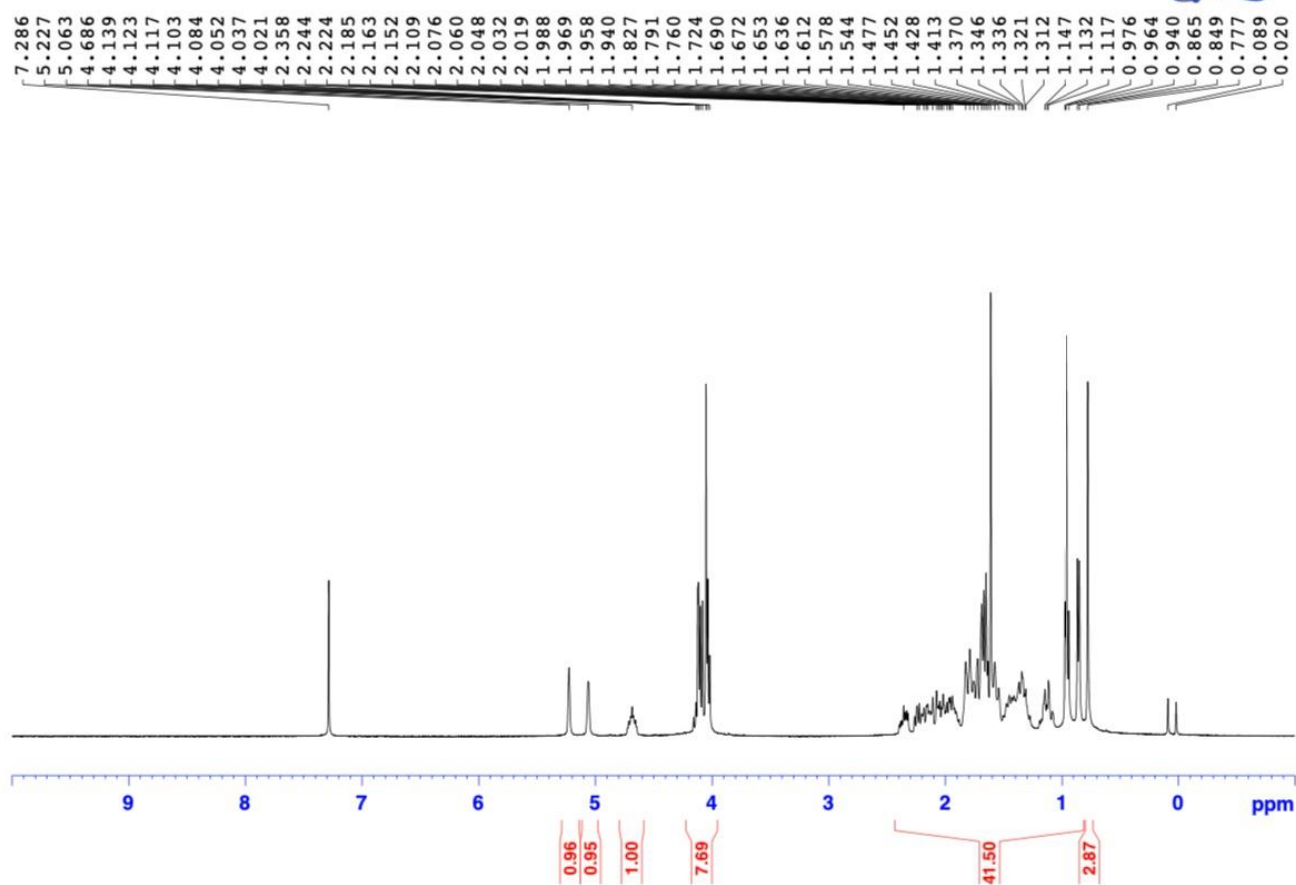

Figure S3. <sup>1</sup>H NMR spectrum of 11c.

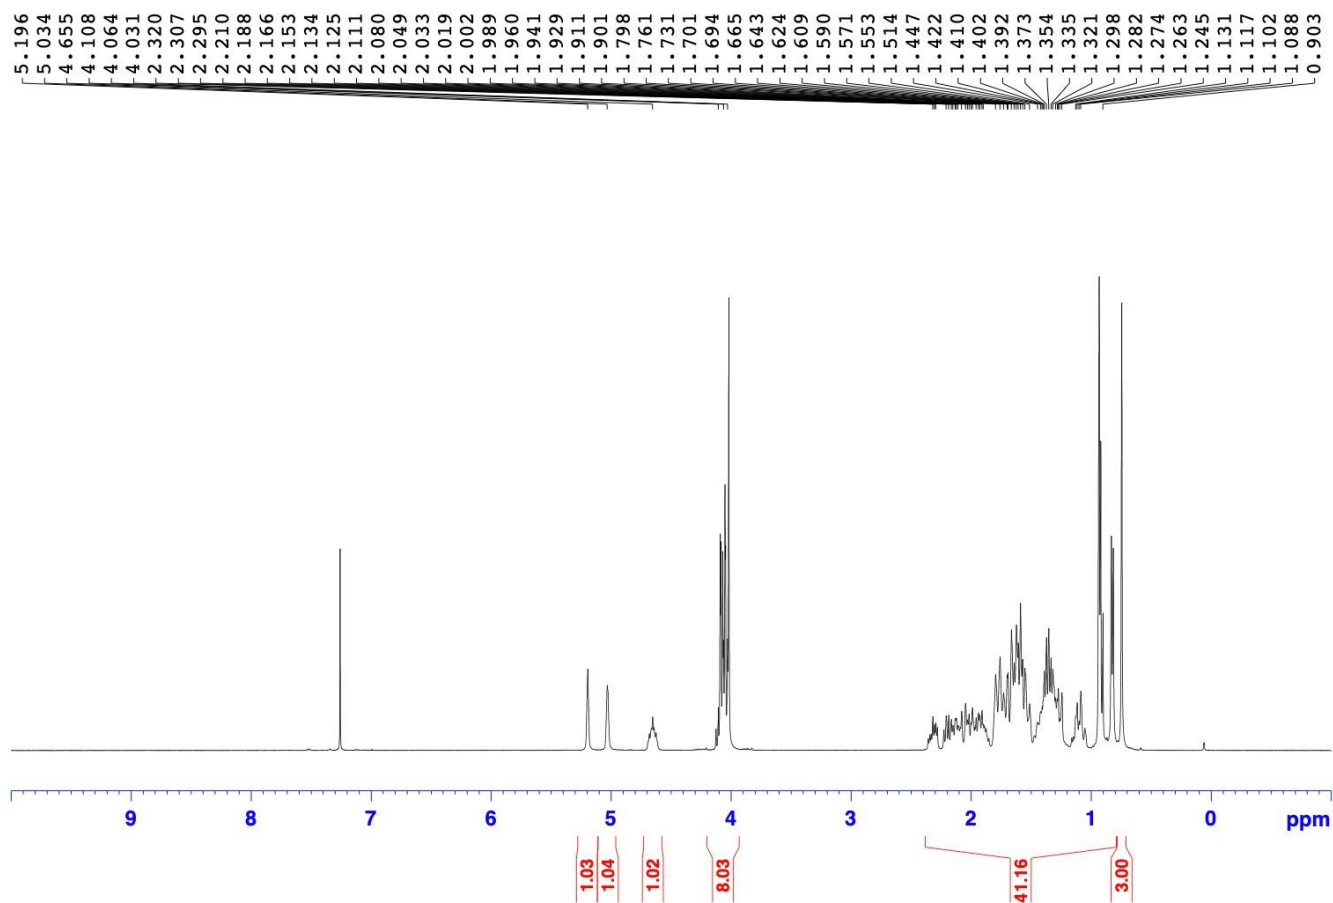

Figure S4. <sup>1</sup>H NMR spectrum of 11d.

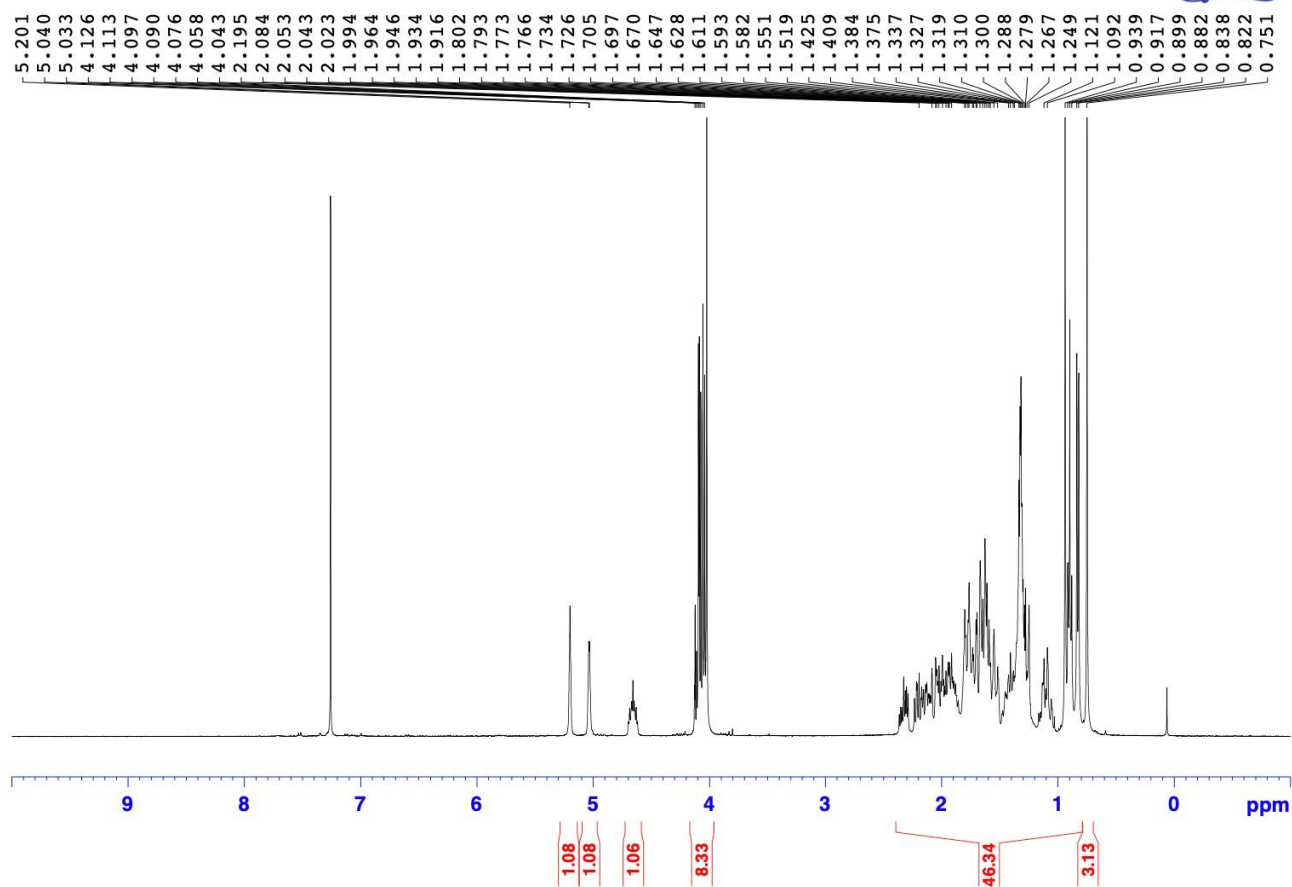

Figure S5. <sup>1</sup>H NMR spectrum of 11e.

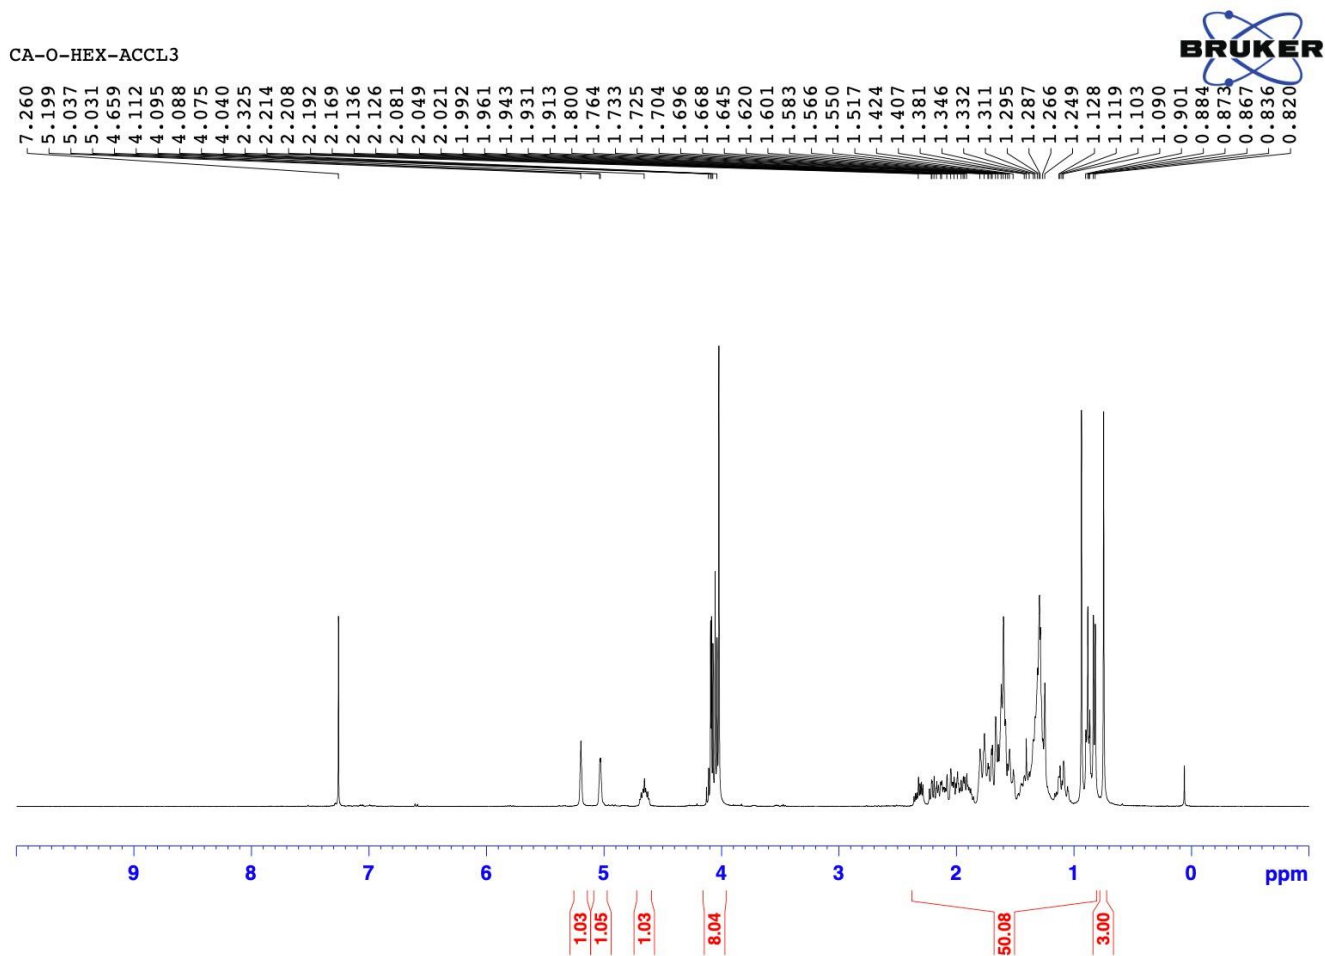

Figure S6.  $^1\text{H}$  NMR spectrum of **11f**.

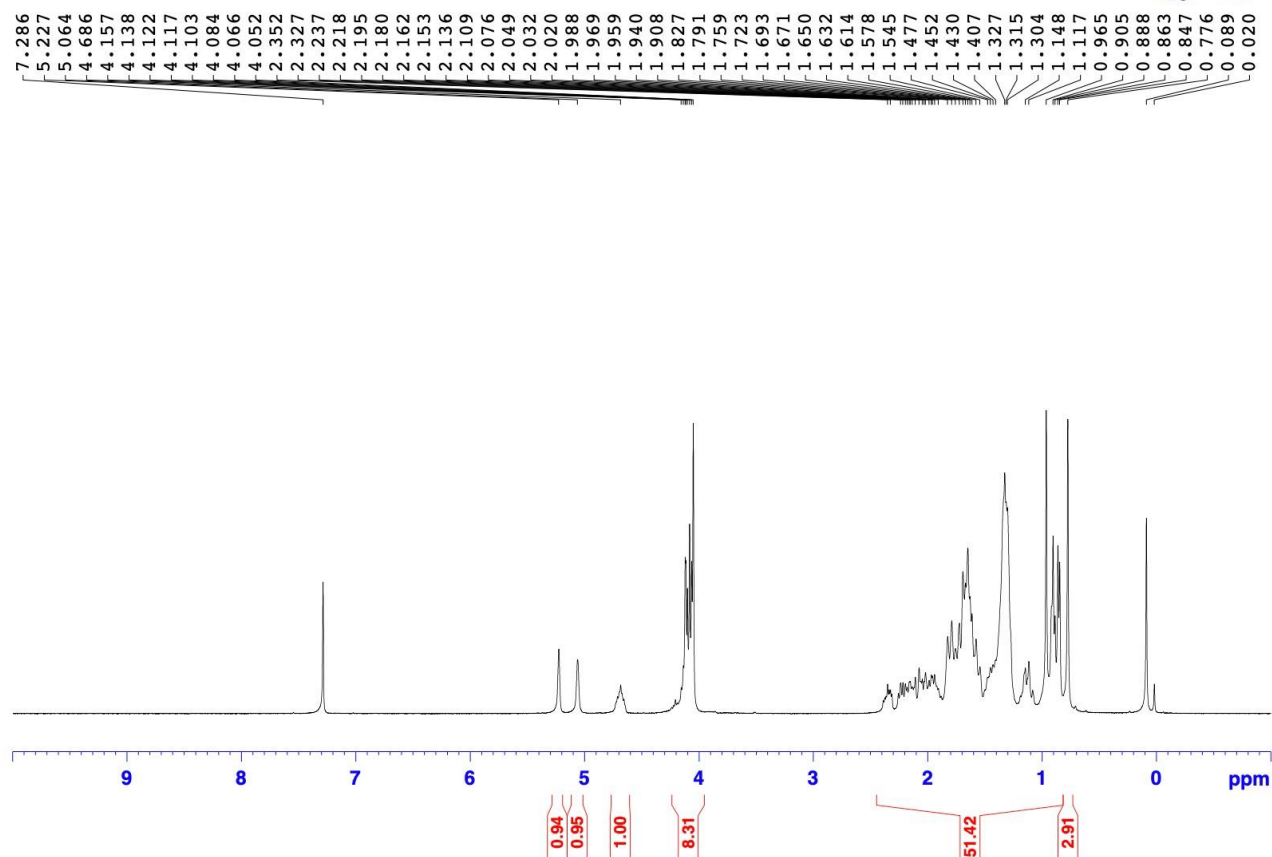

Figure S7. <sup>1</sup>H NMR spectrum of 11g.



Ca-OC8-ACC13

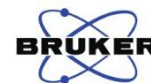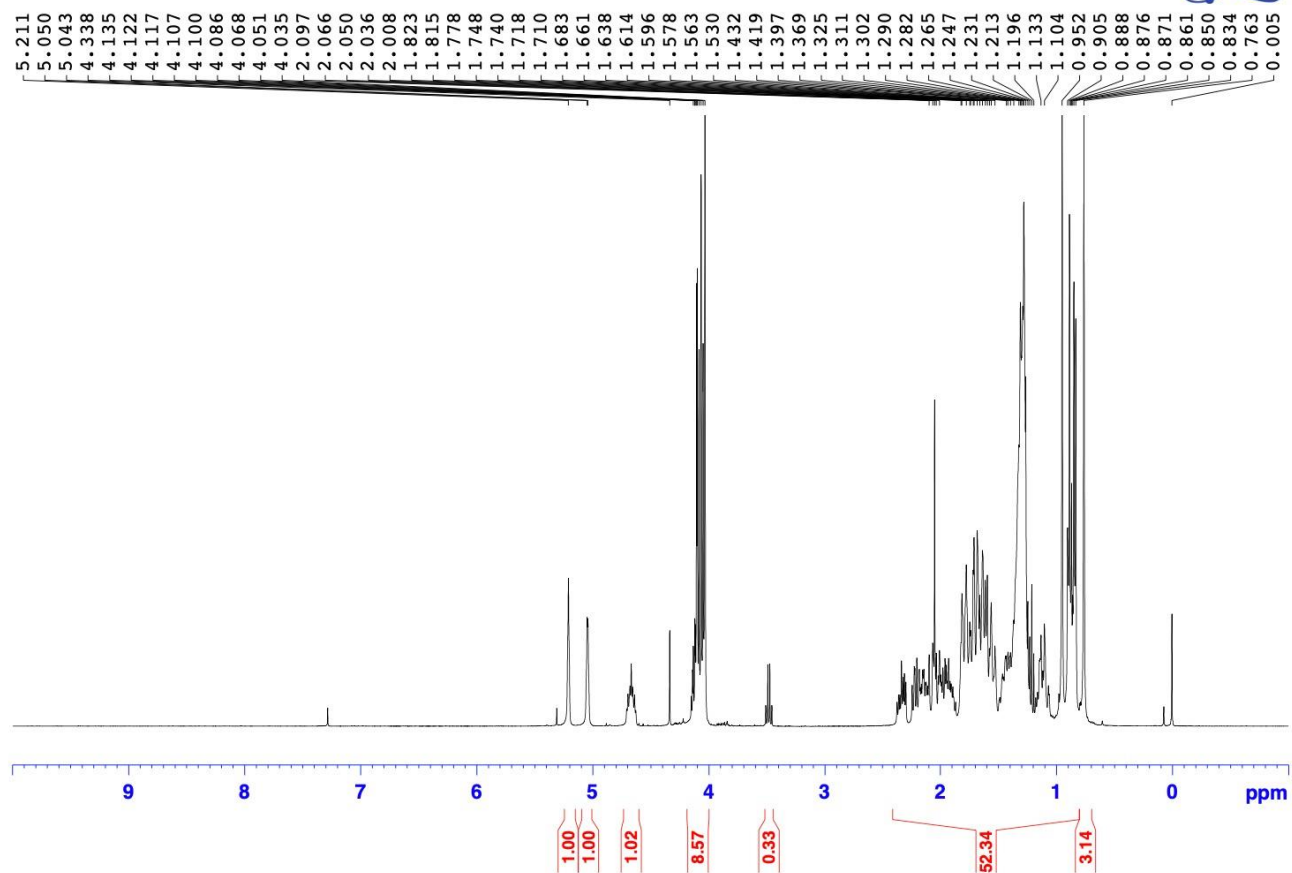

Figure S8.  $^1\text{H}$  NMR spectrum of 11h.

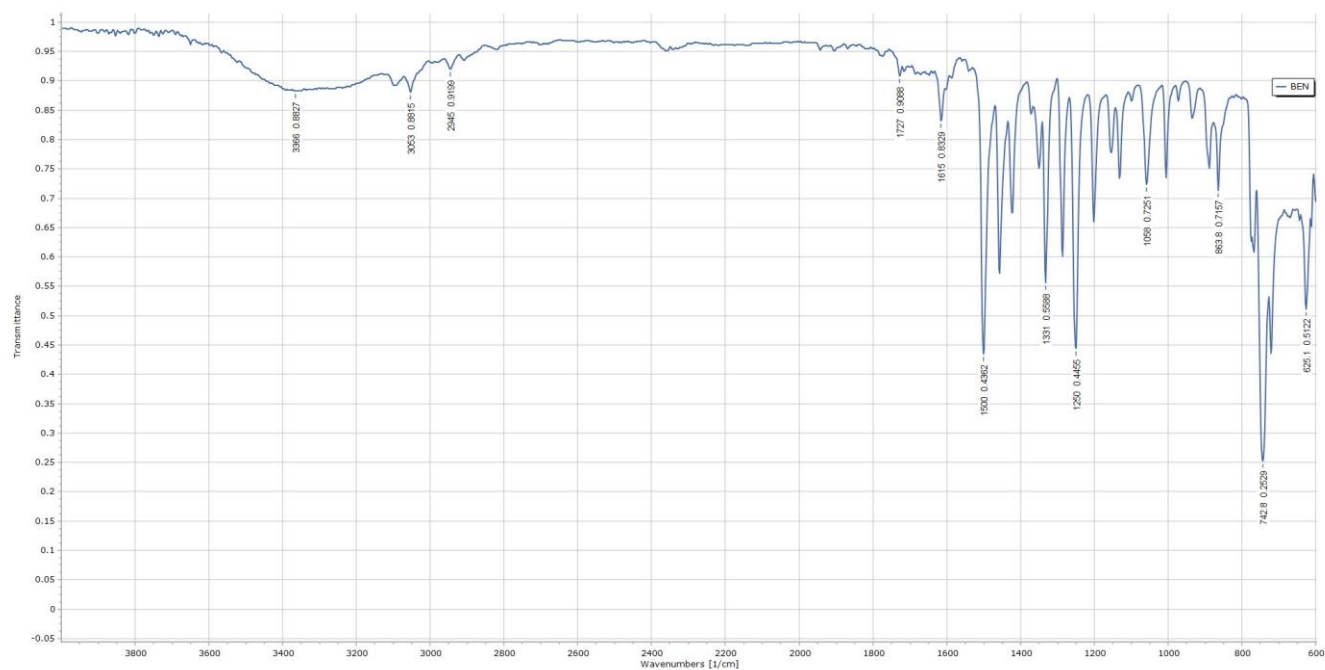

**Figure S9.** IR spectrum of *N*-methyl benzimidazole.

A

CA-METHYL-BI

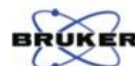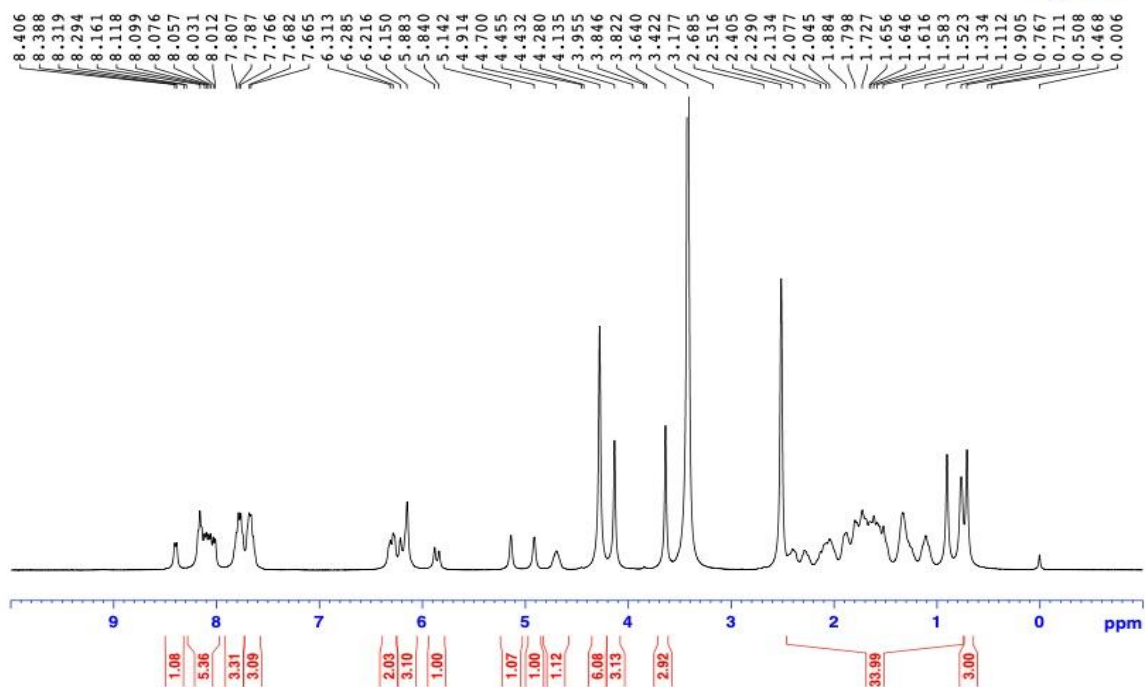

B

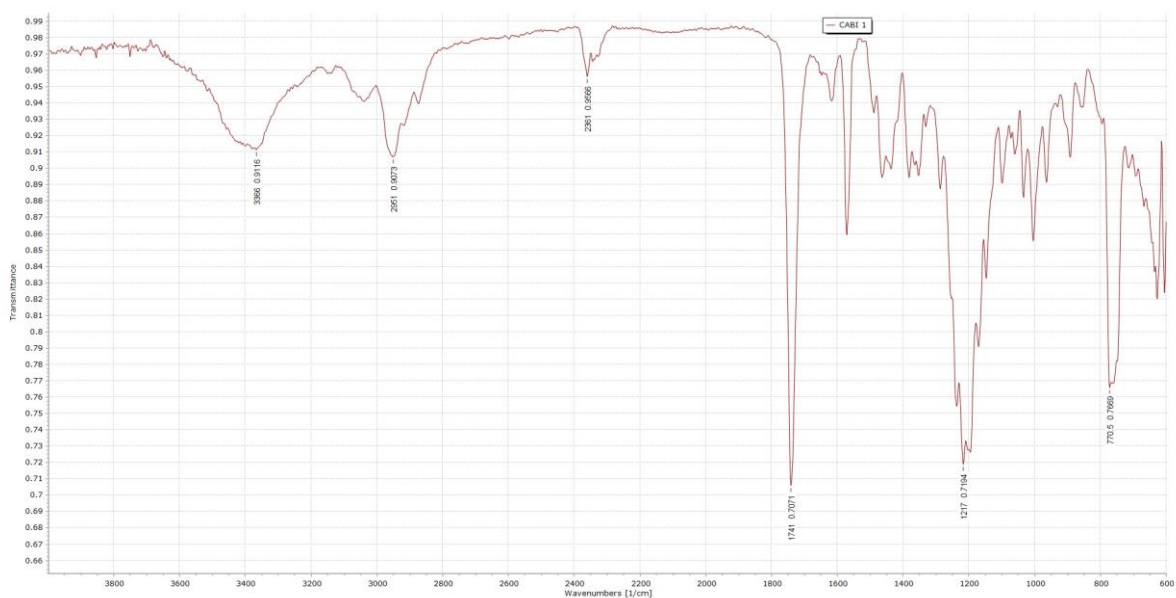

Figure S10. (A) <sup>1</sup>H NMR spectrum of CABI-1. (B) IR spectrum of CABI-1.

A

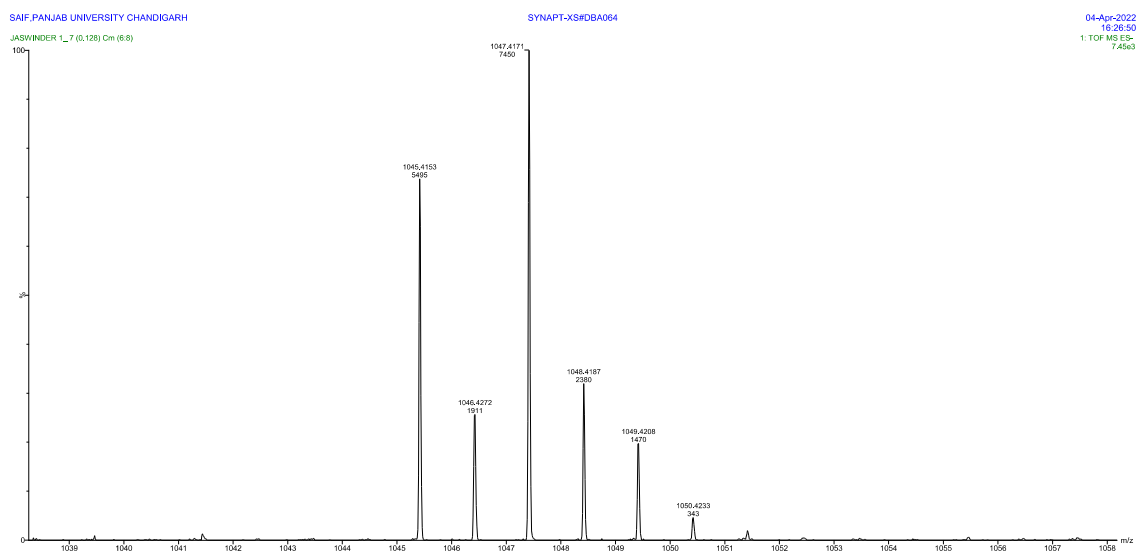

B

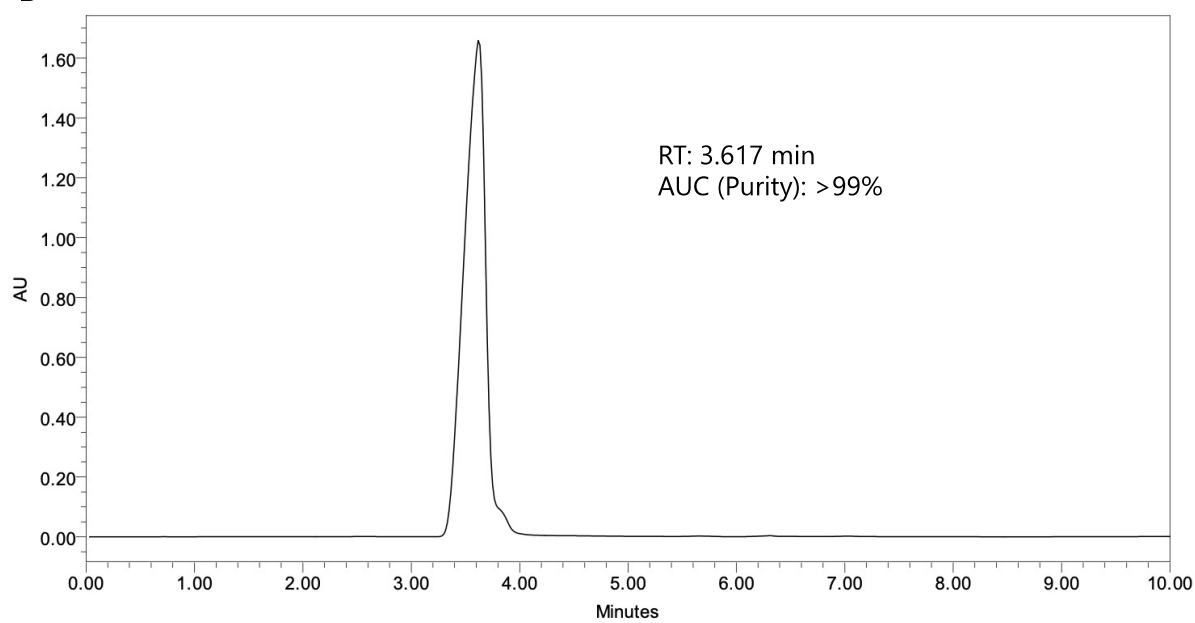

**Figure S11. (A) Mass spectrum of CABI-1. (B) HPLC chromatograph of CABI-1.**

A

CA-BIETHYL DEV

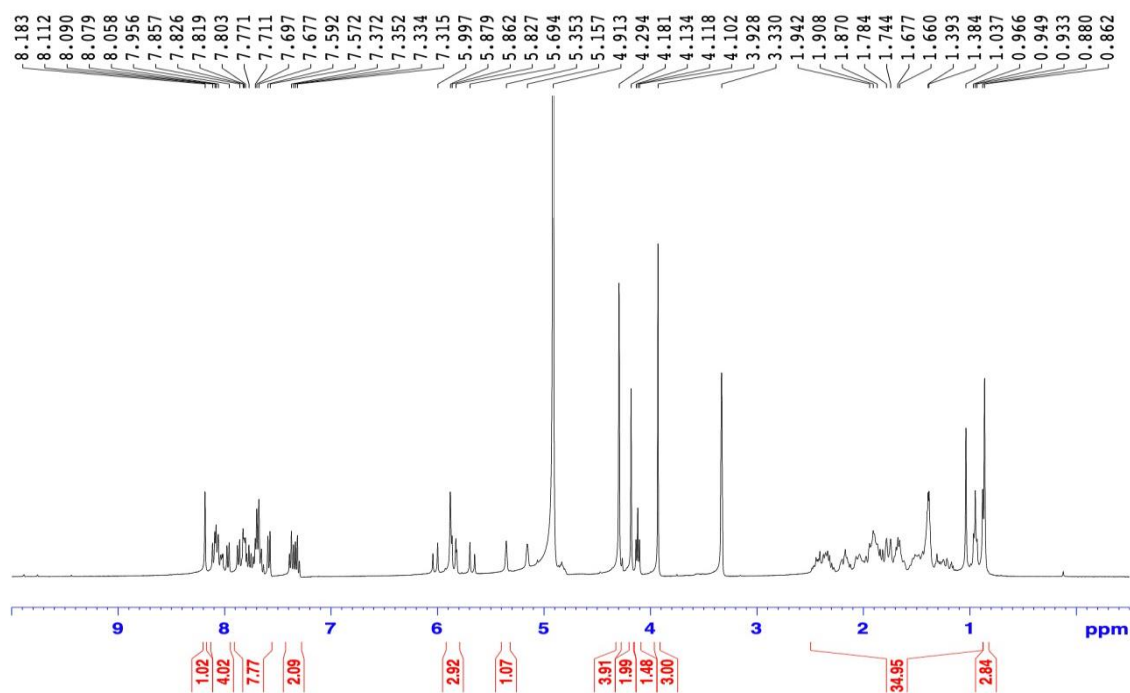

B

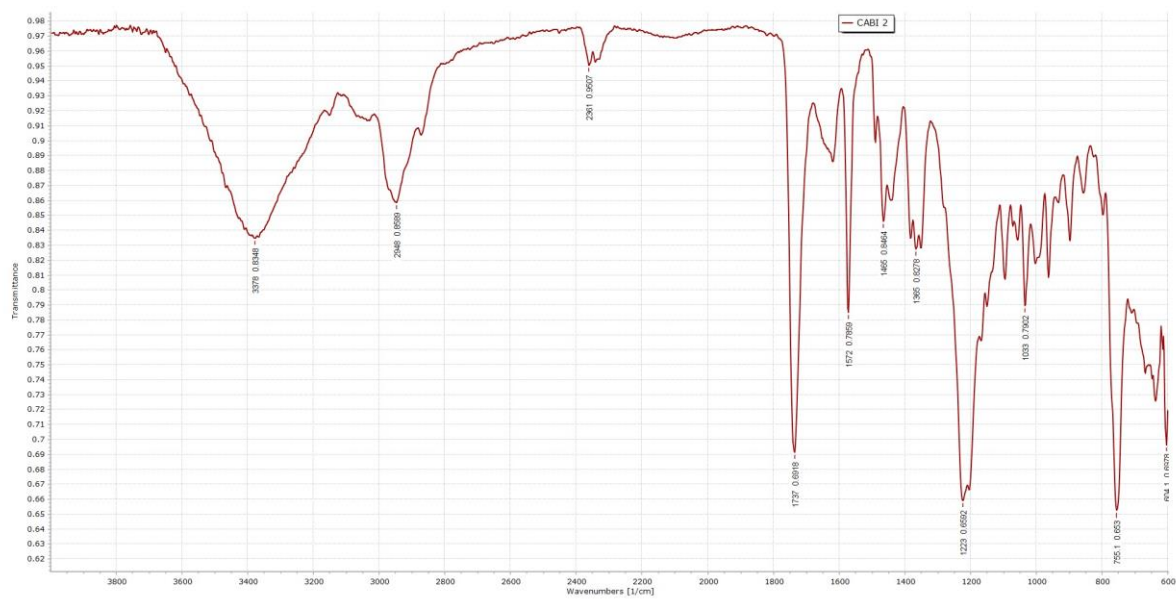

**Figure S12. (A) <sup>1</sup>H NMR spectrum of CABI-2. (B) IR spectrum of CABI-2.**

A

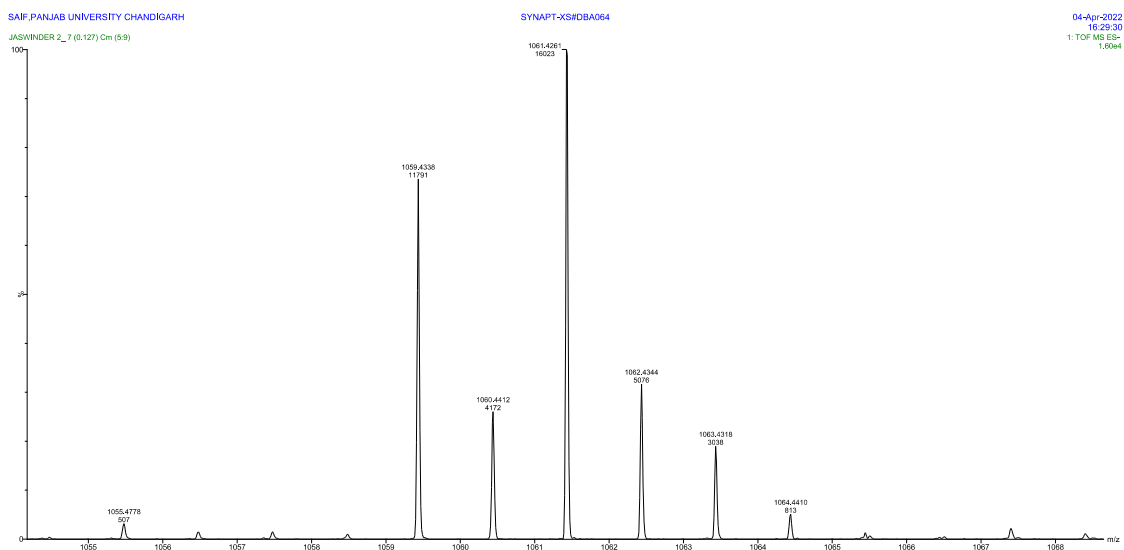

B

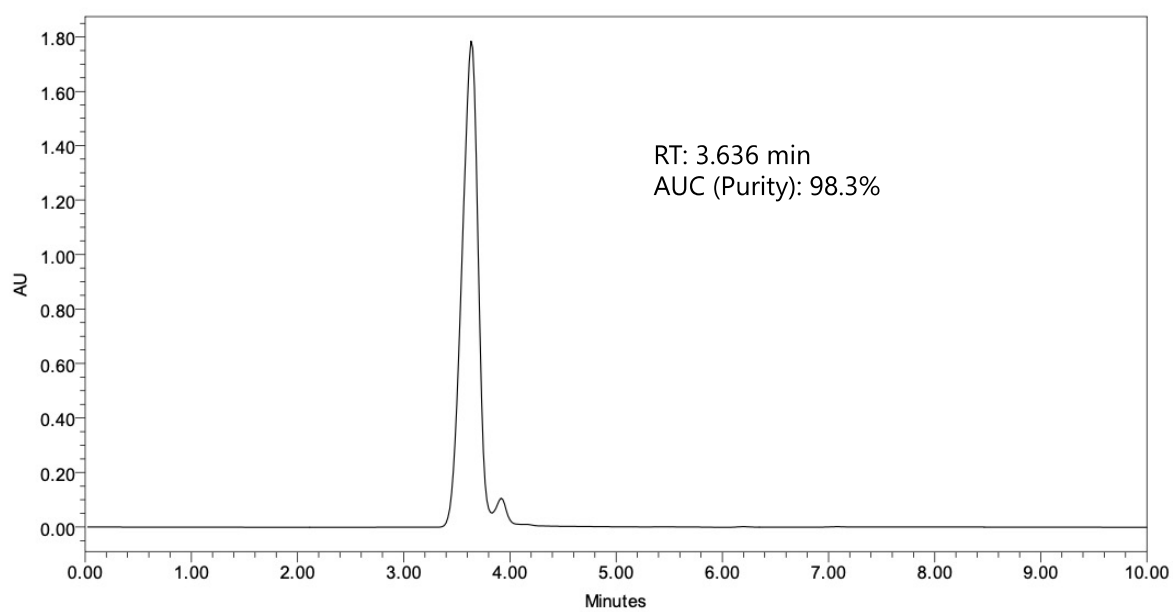

**Figure S13. (A) Mass spectrum of CABI-2. (B). IR spectrum of CABI-2.**

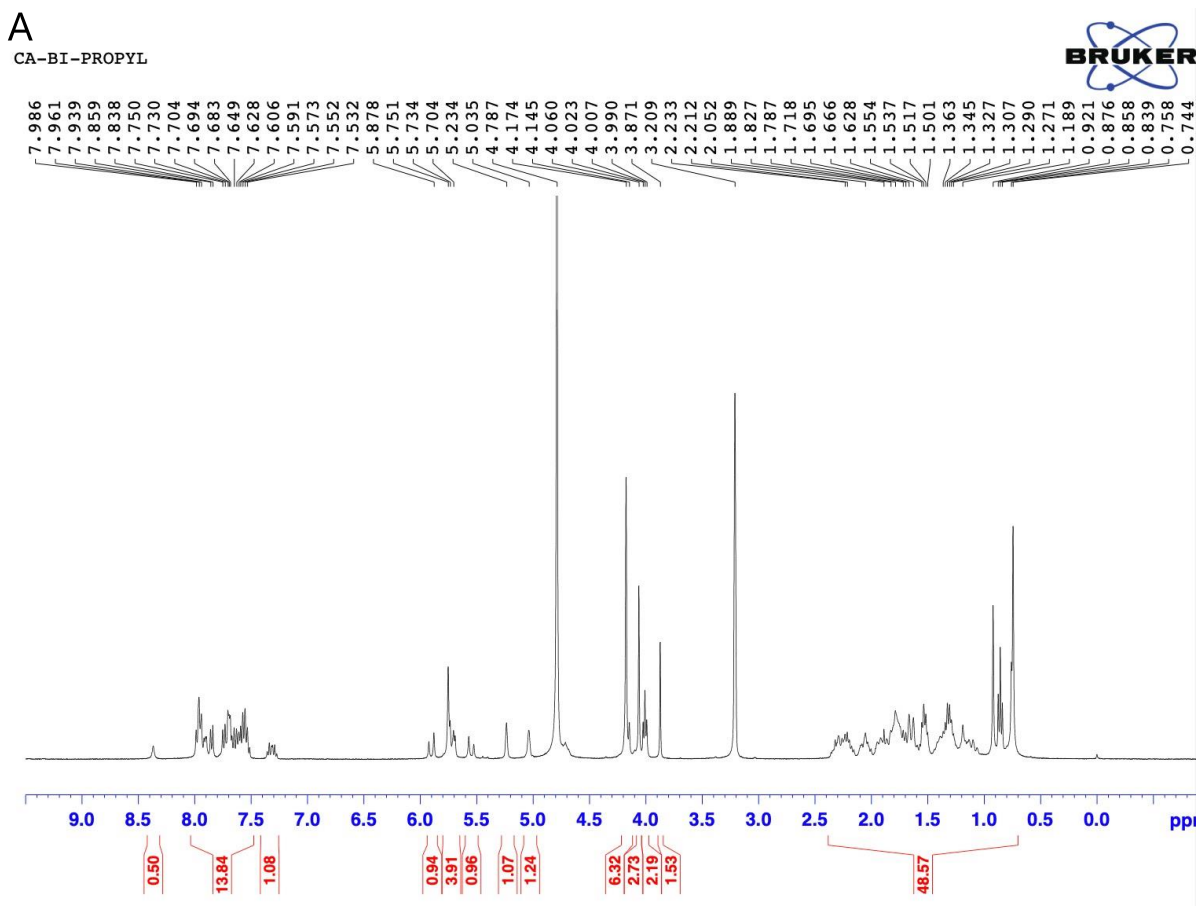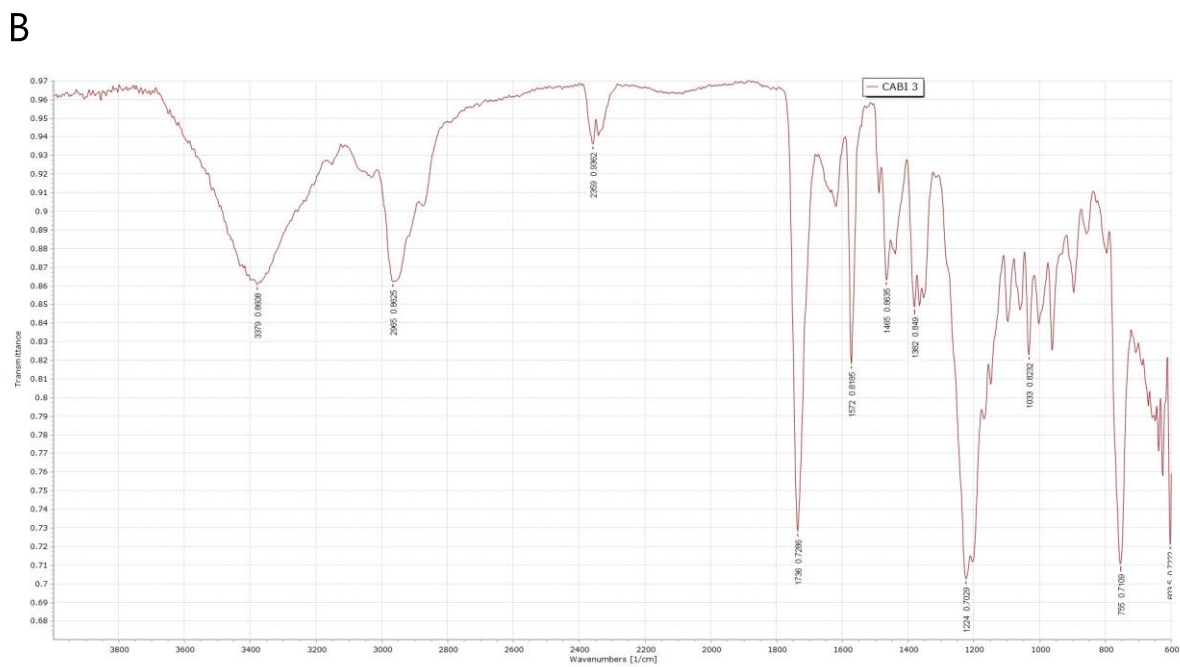

**Figure S14. (A)  $^1\text{H}$  NMR spectrum of CABI-3. (B). IR spectrum of CABI-3.**

**A**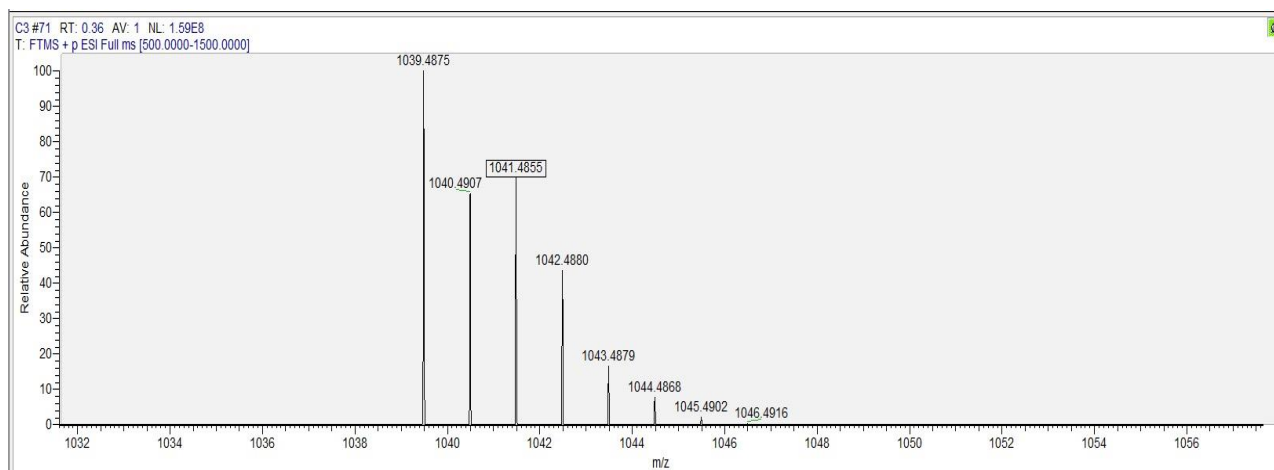**B**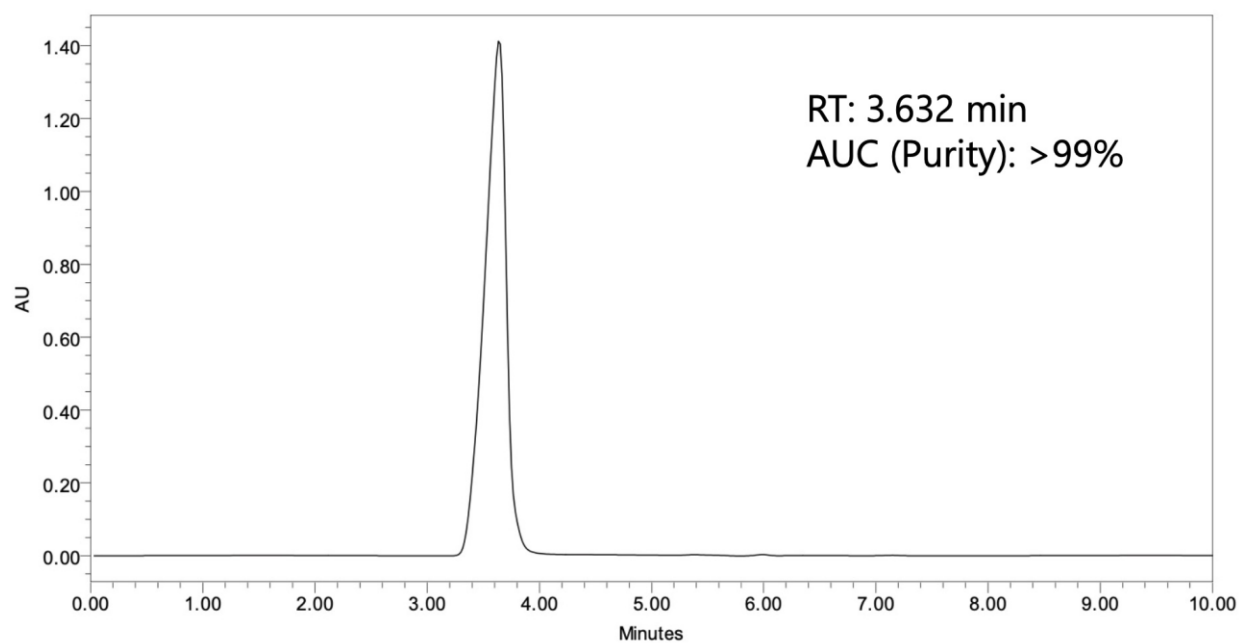

**Figure S15. (A) Mass spectrum of CABI-3. (B) HPLC chromatograph of CABI-3.**



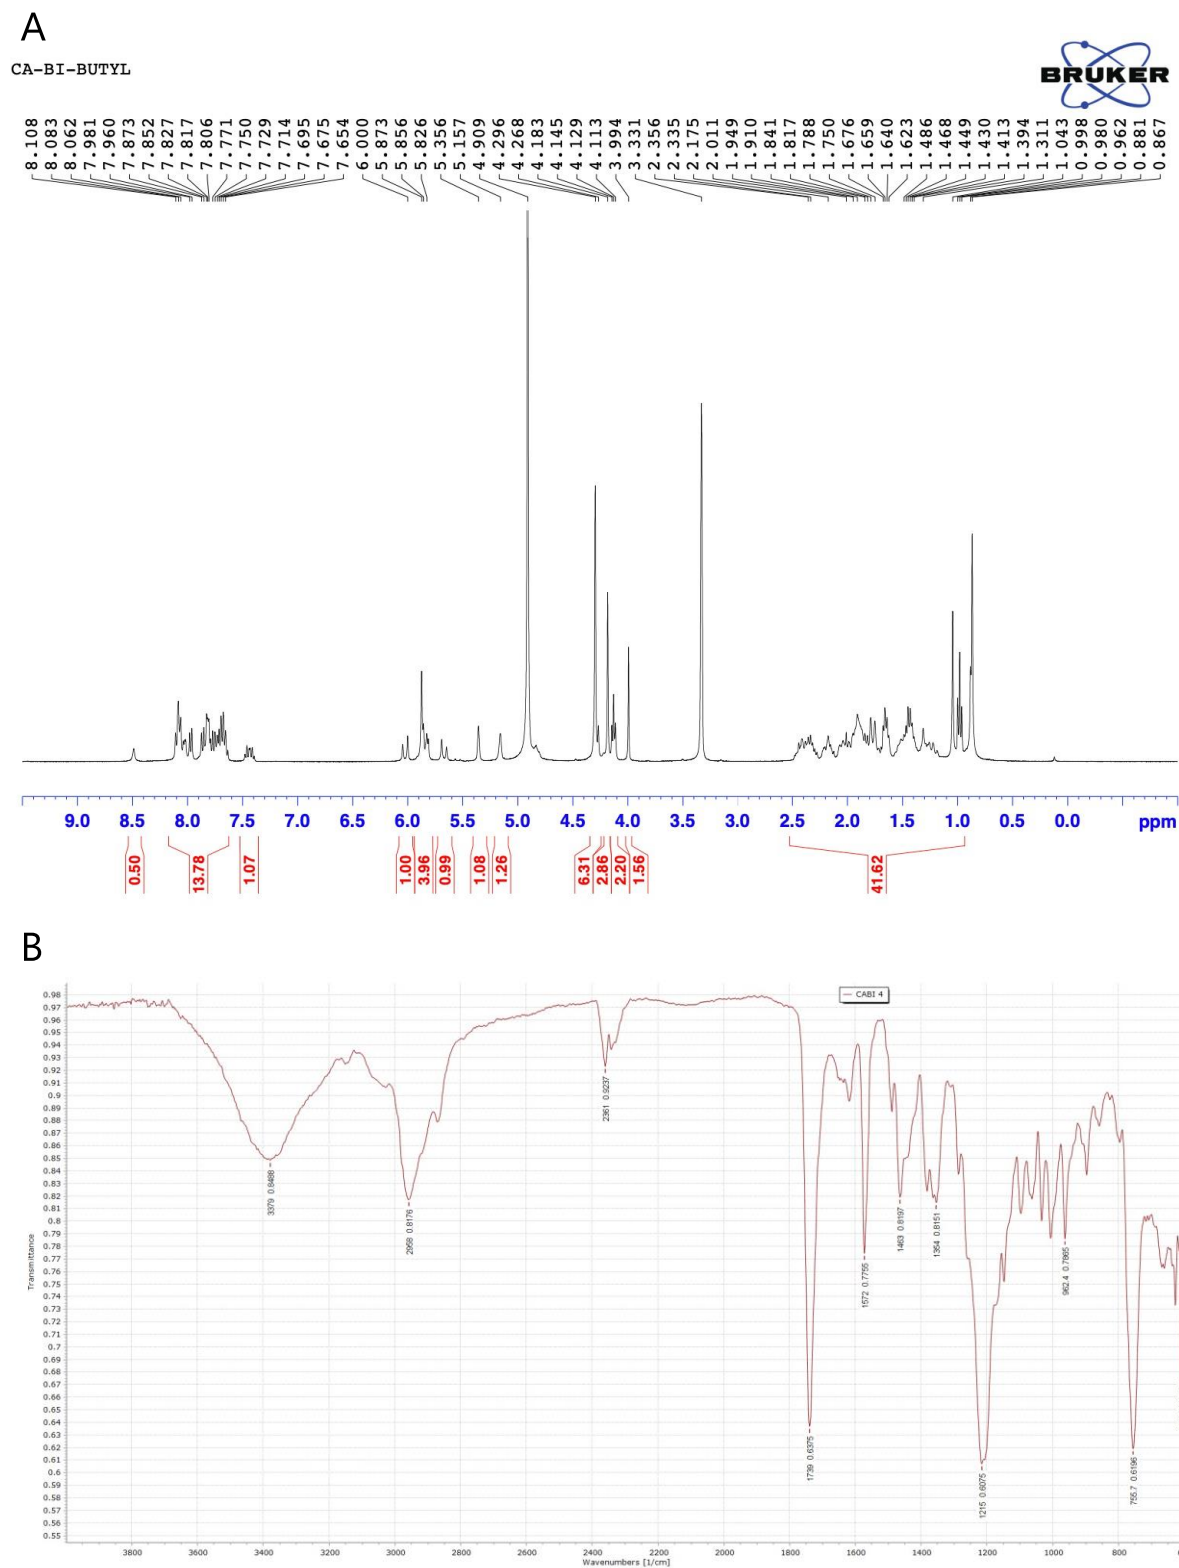

**Figure S16. (A)  $^1\text{H}$  NMR spectrum of CABI-4. (B) IR spectrum of CABI-4.**

A

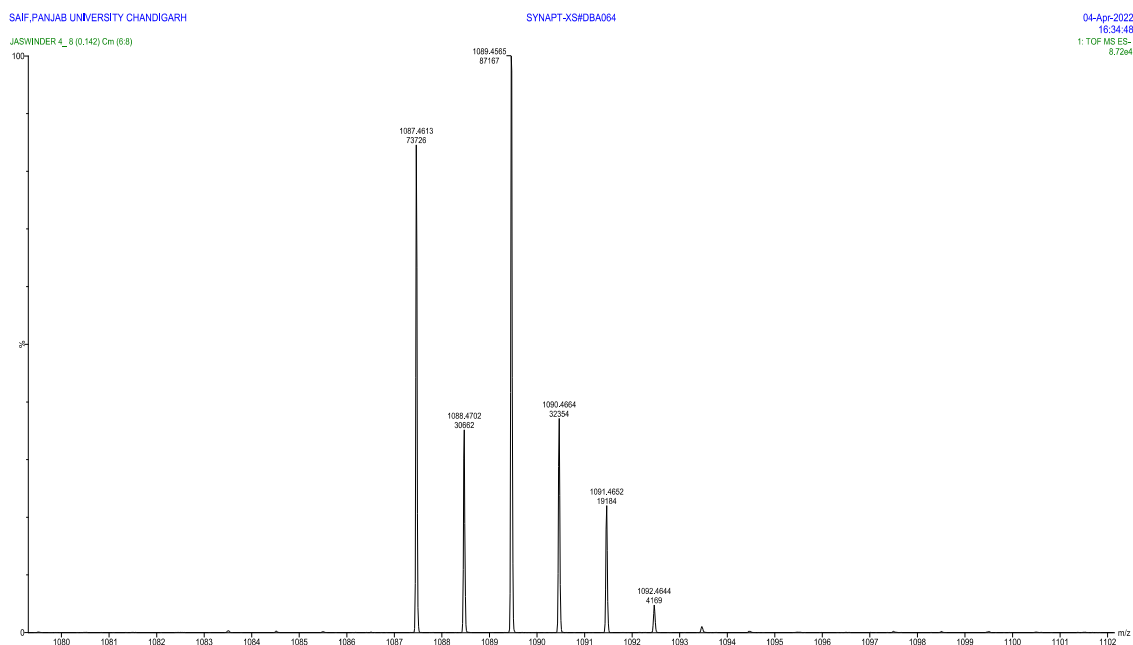

B

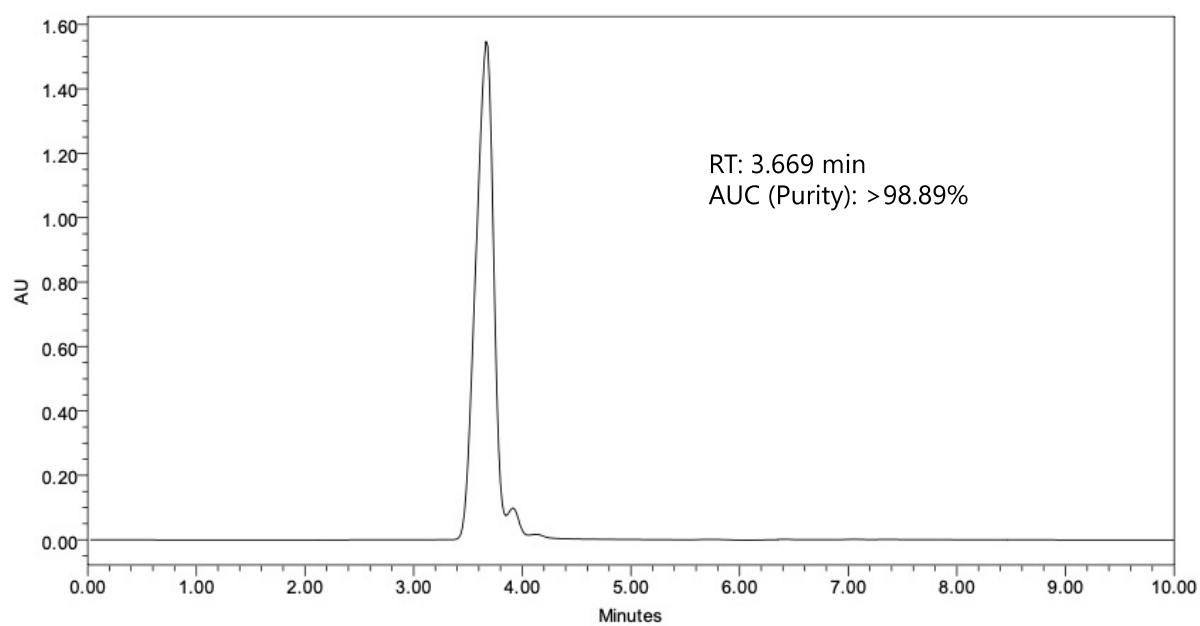

**Figure S17. (A) Mass spectrum of CABI-4. (B) HPLC chromatograph of CABI-4.**

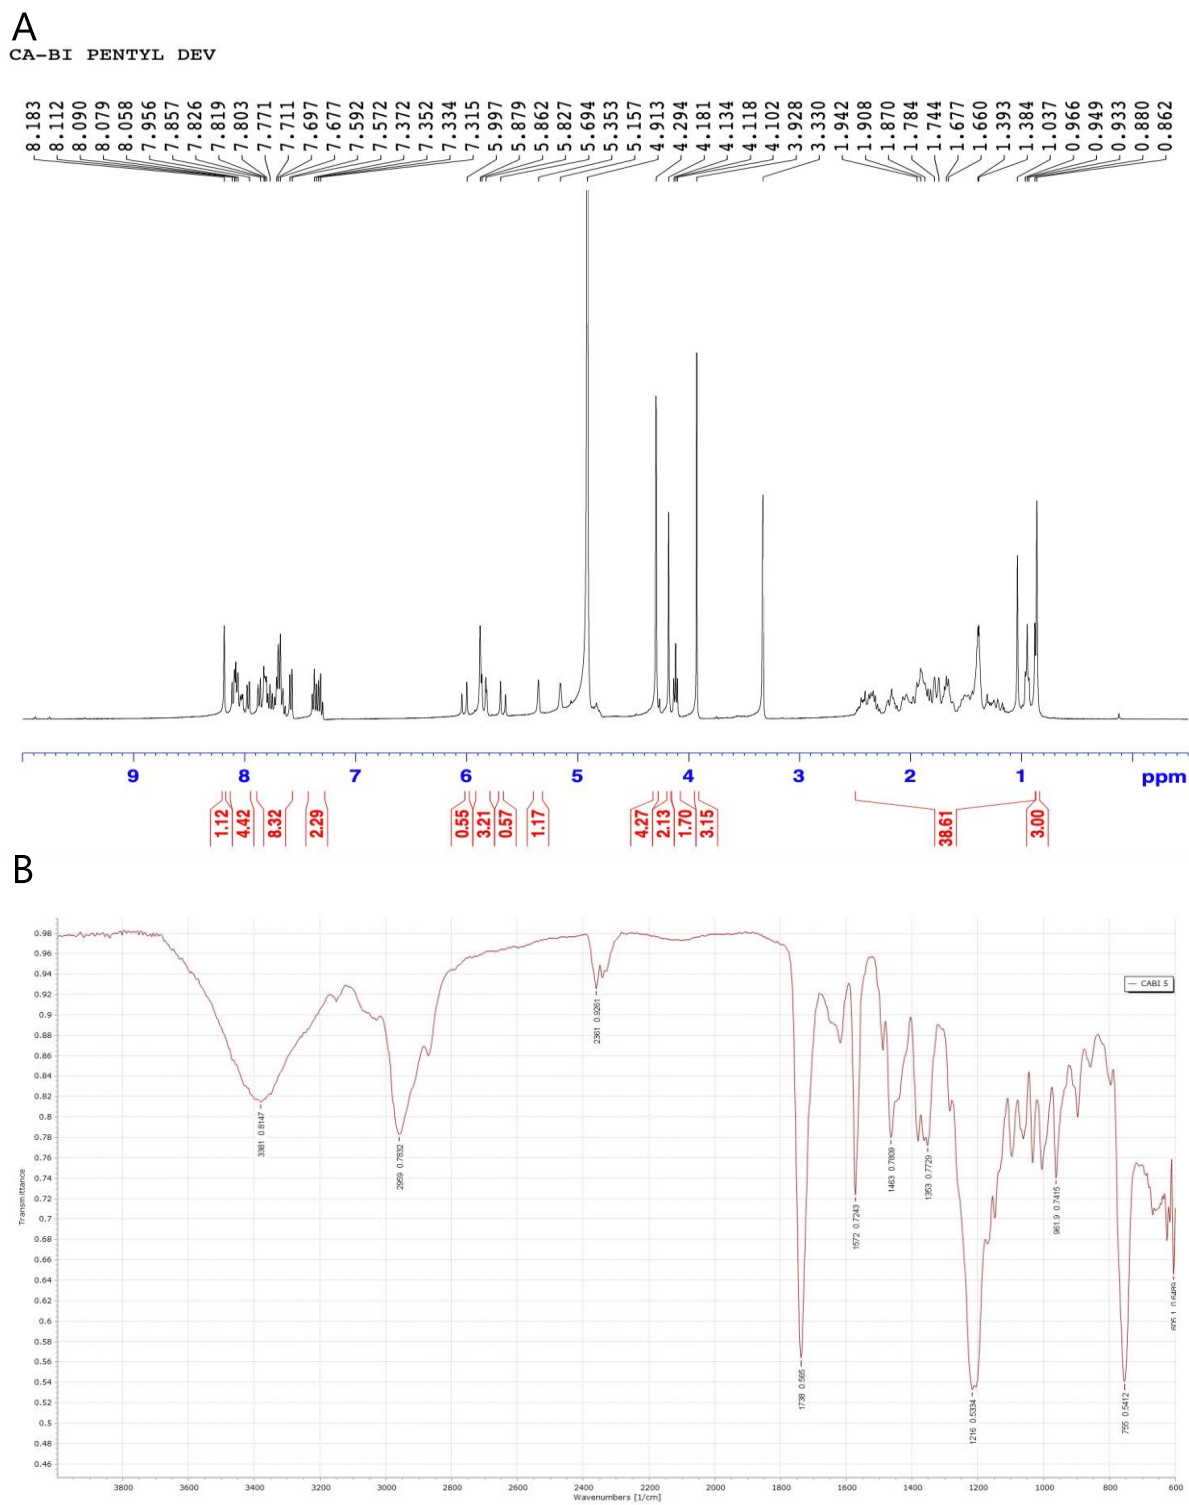

**Figure S18. (A)  $^1\text{H}$  NMR spectrum of CABI-5. (B) IR spectrum of CABI-5.**

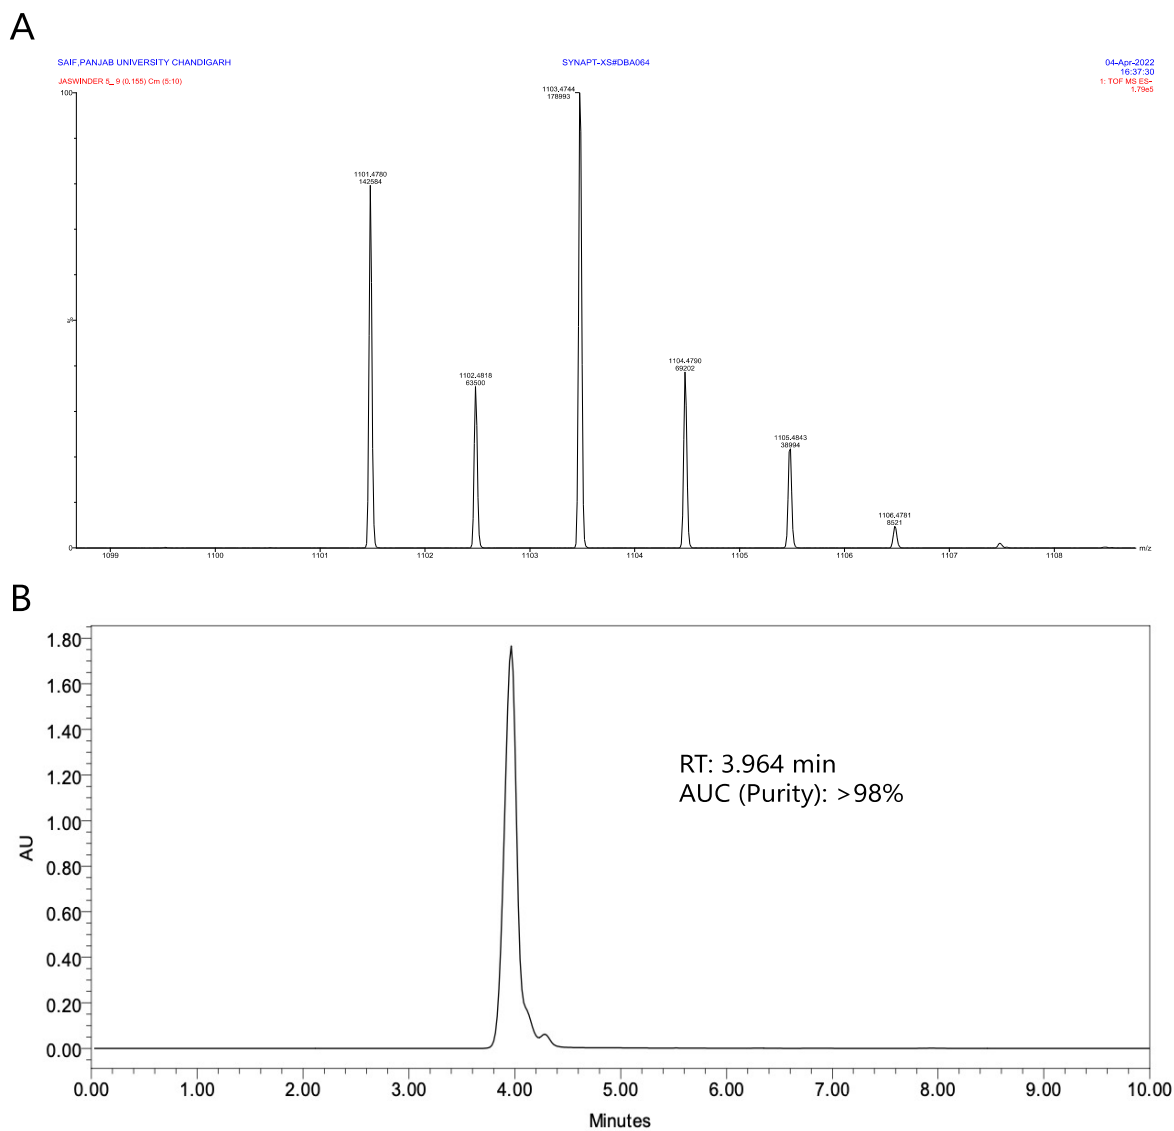

**Figure S19. (A) Mass spectrum of CABI-5. (B) HPLC chromatograph of CABI-5.**

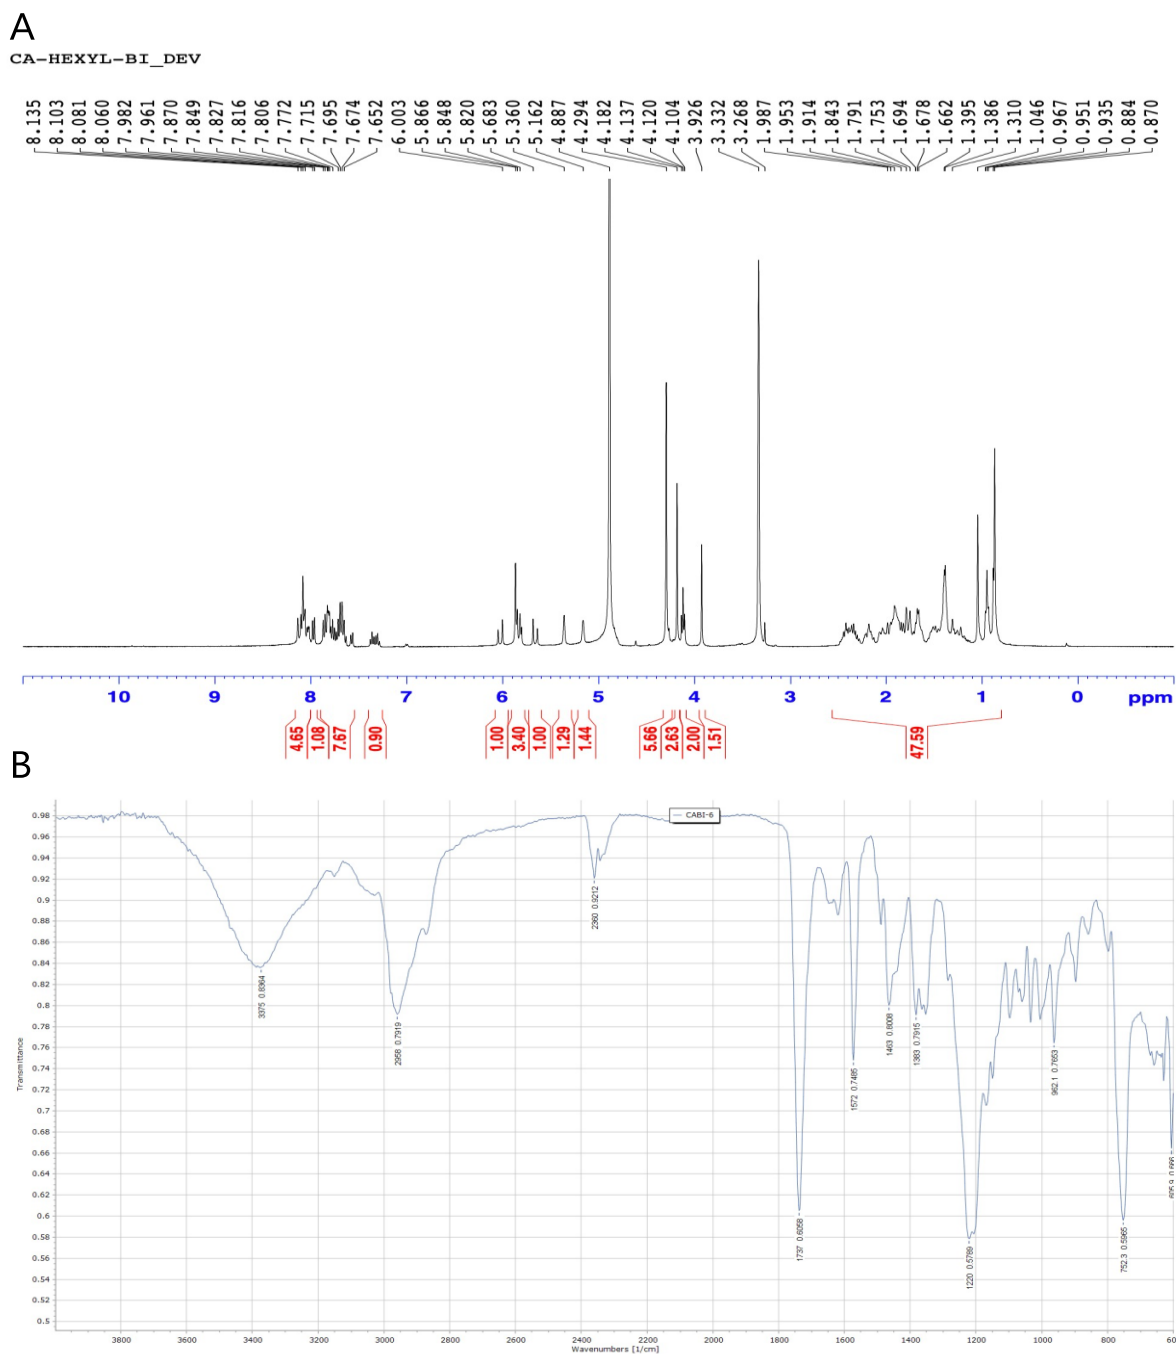

**Figure S20. (A)  $^1\text{H}$  NMR spectrum of CABI-6. (B) IR spectrum of CABI-6.**

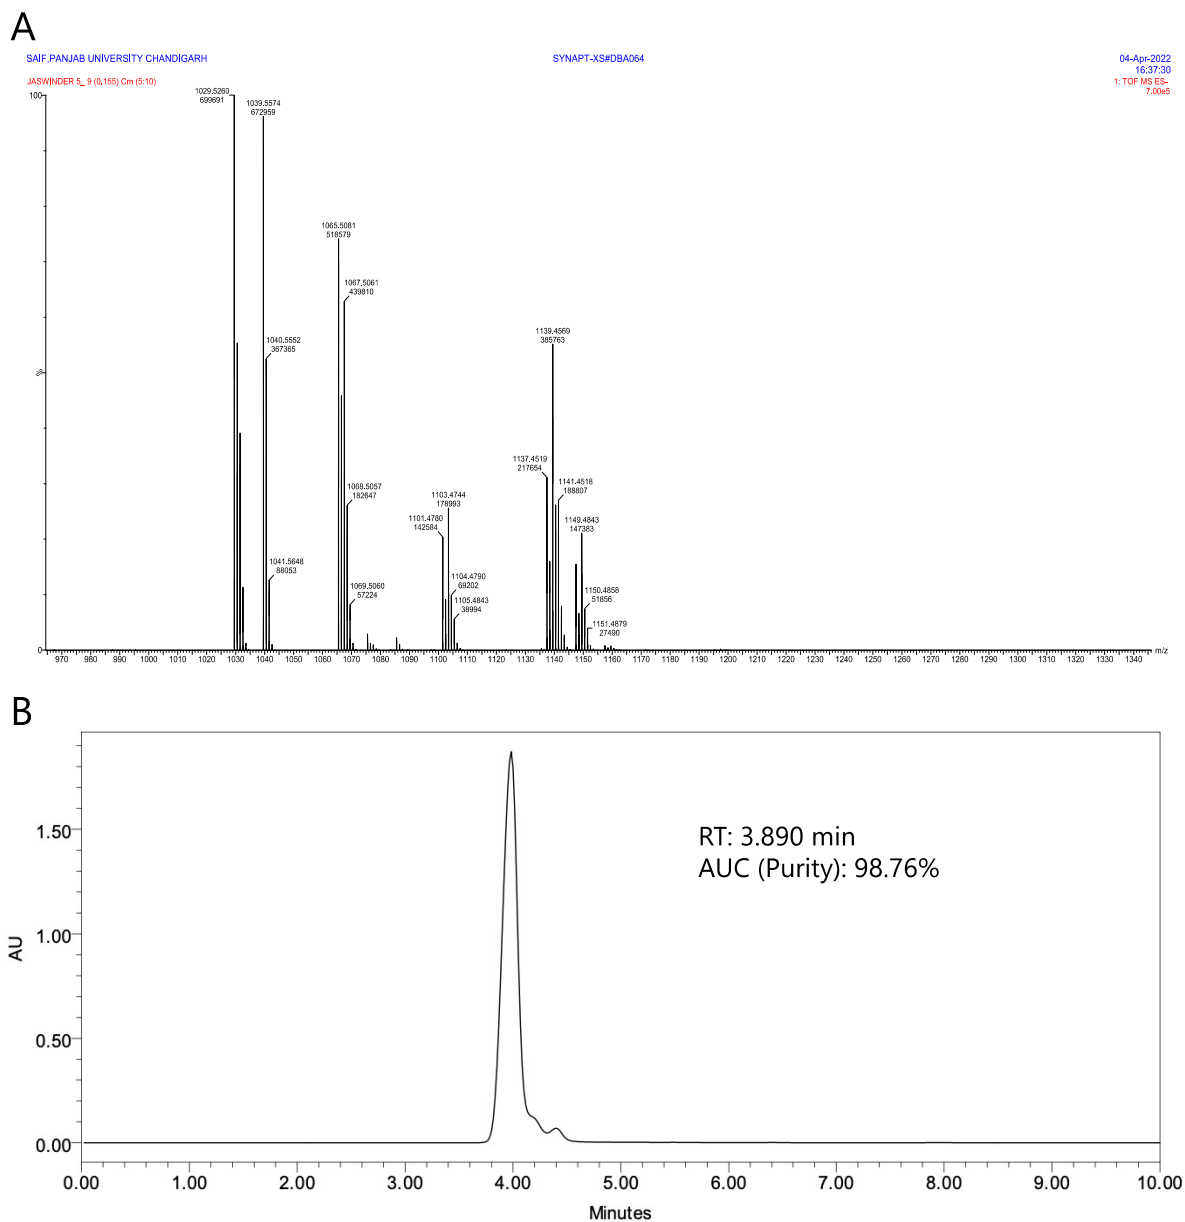

**Figure S21. (A) Mass spectrum of CABI-6. (B) HPLC chromatograph of CABI-6.**

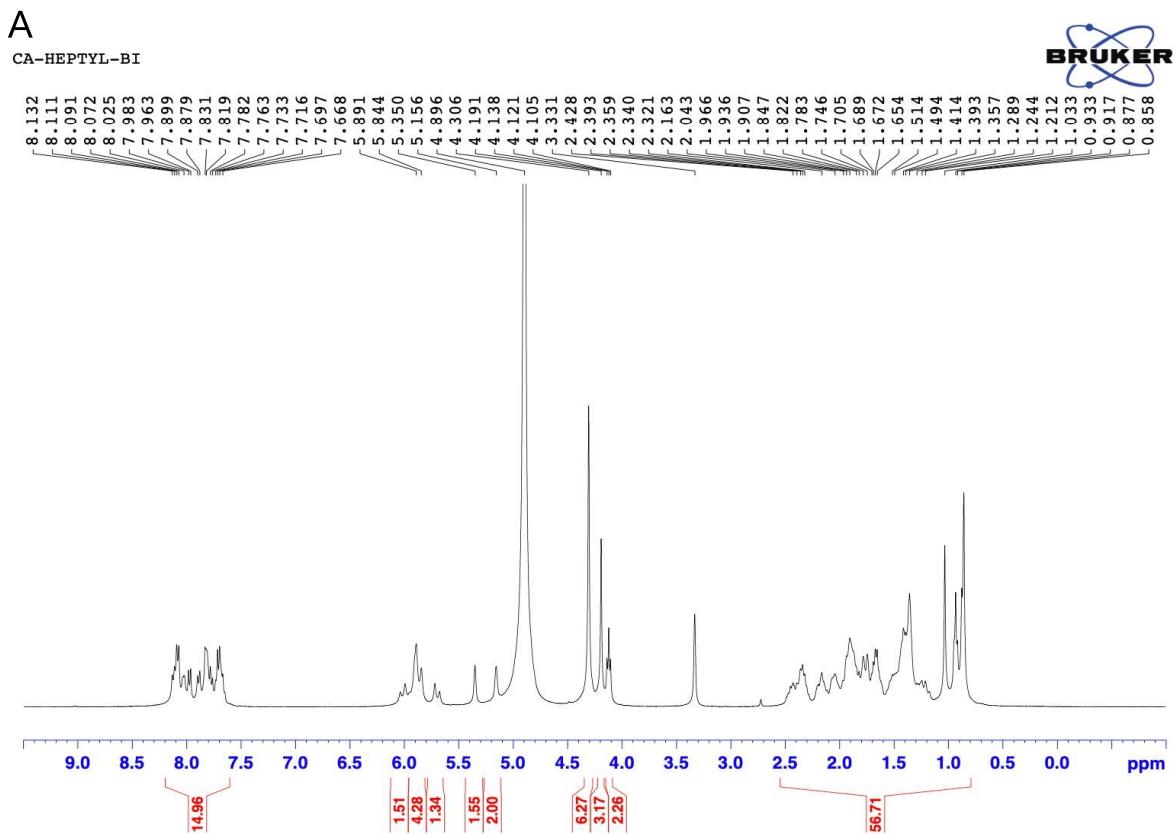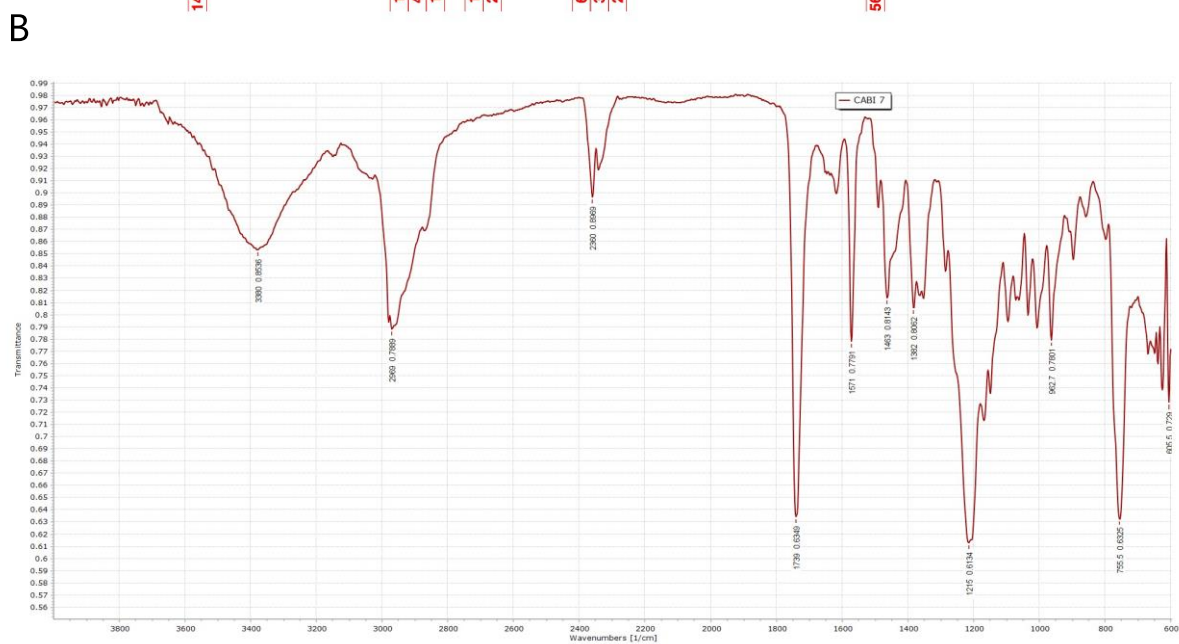

**Figure S22. (A)  $^1\text{H}$  NMR spectrum of CABI-7. (B) IR spectrum of CABI-7.**

**A**

SAIF, PANJAB UNIVERSITY CHANDIGARH  
JASWINDER\_7\_9 (0.155) Cm (5.9)

SYNAPT-XS#DBA064

04-Apr-2022  
16:42:51  
1: TOP MS 1-S-  
9.66e4

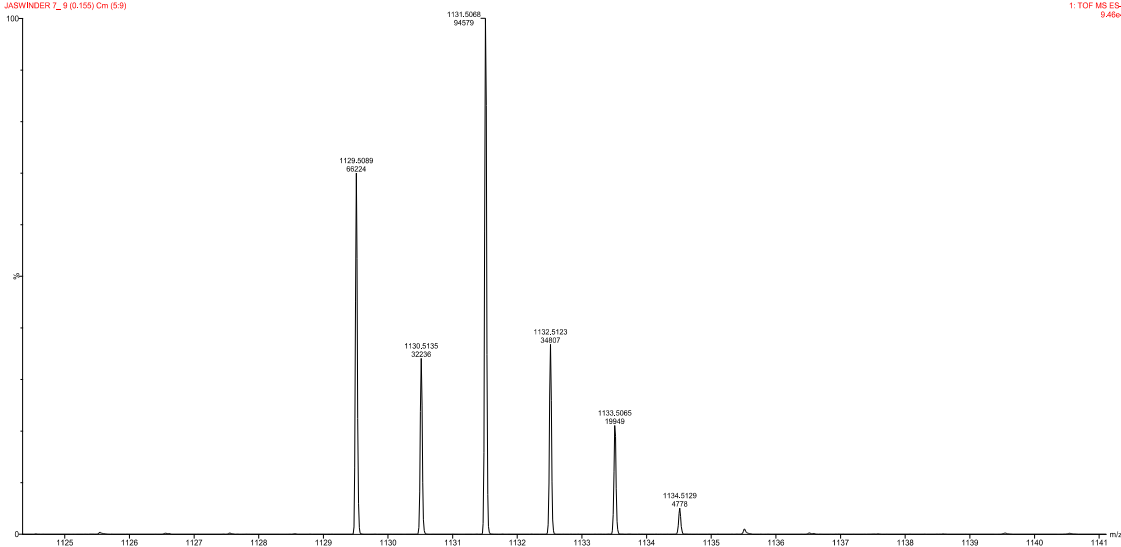**B**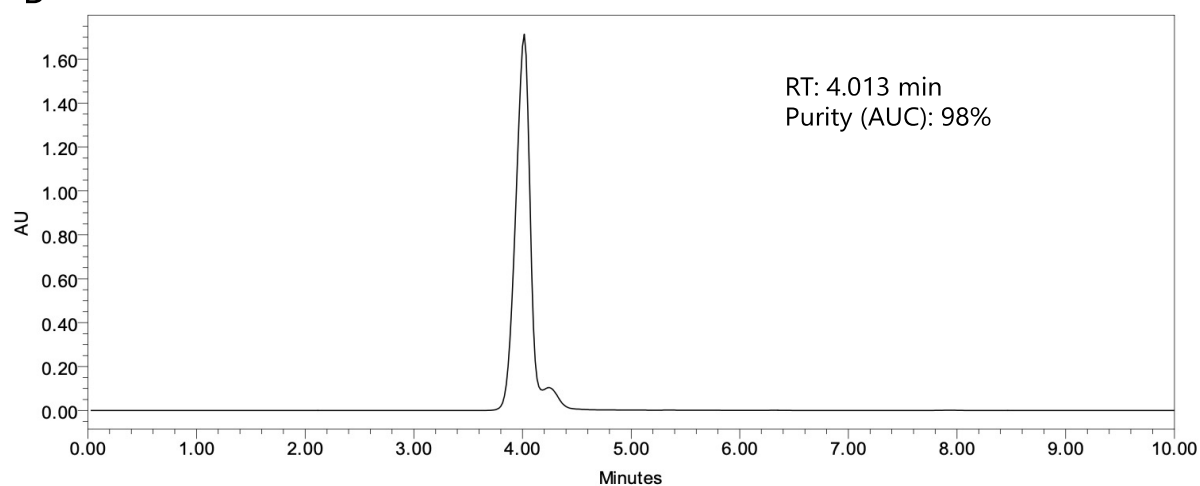

**Figure S23. (A) Mass spectrum of CABI-7. (B) HPLC chromatograph of CABI-7.**



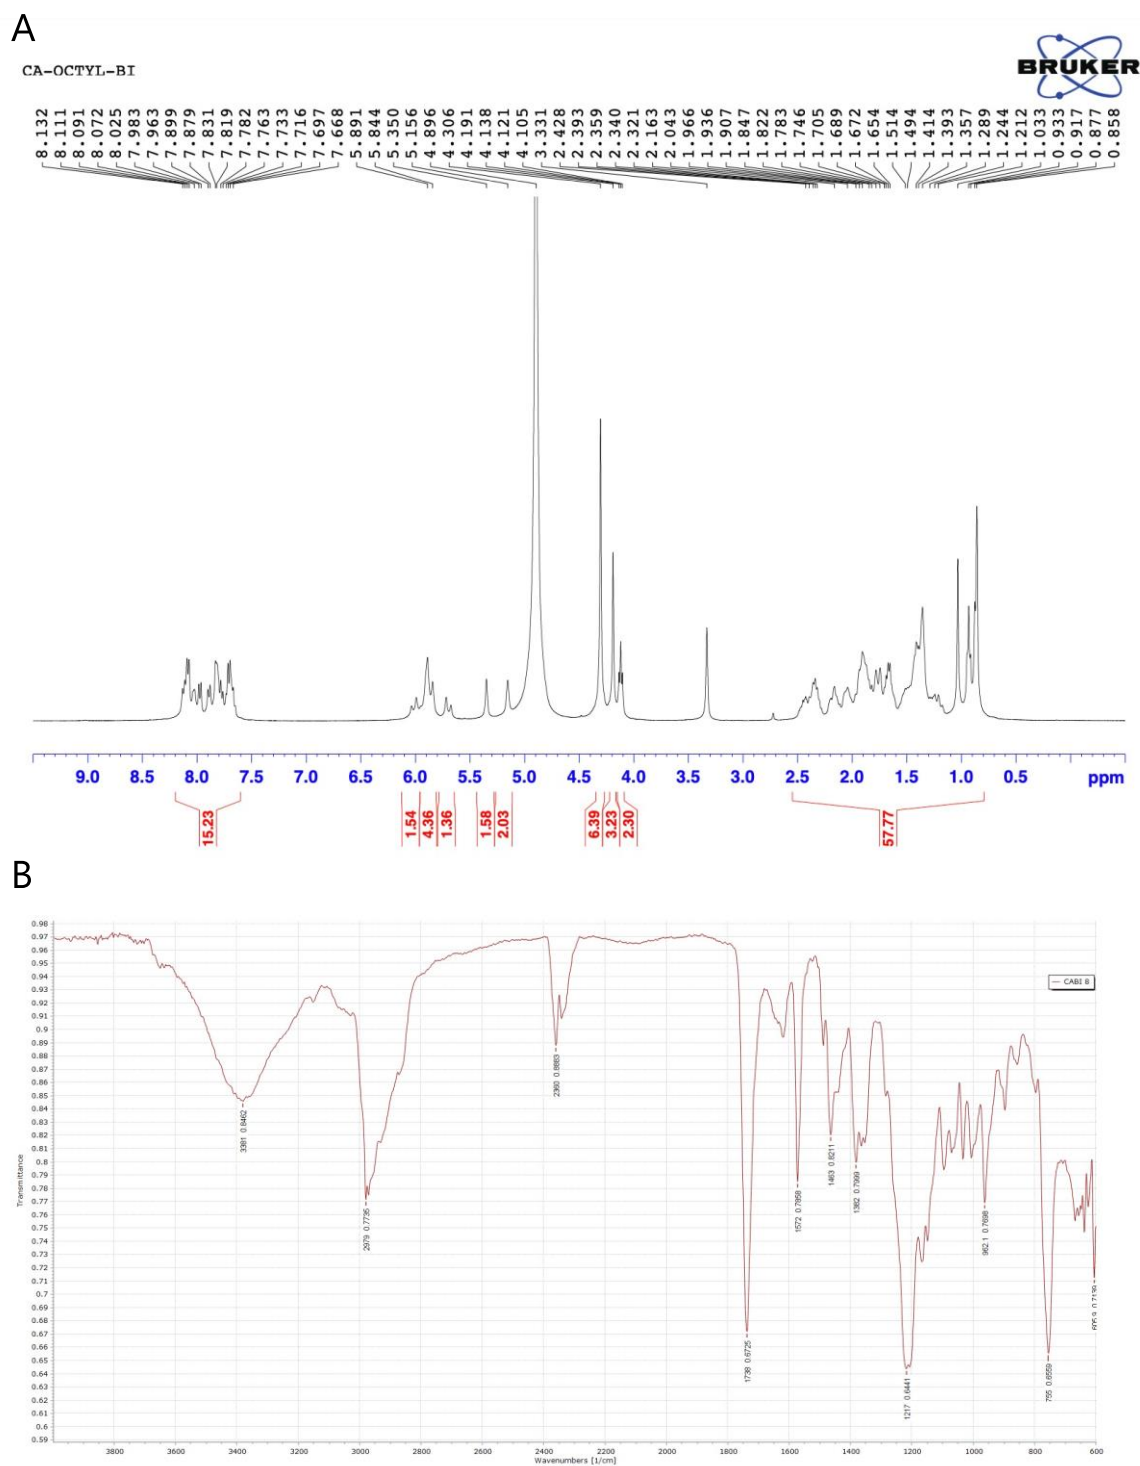

**Figure S24. (A)  $^1\text{H}$  NMR spectrum of CABI-8. (B) IR spectrum of CABI-8.**

A

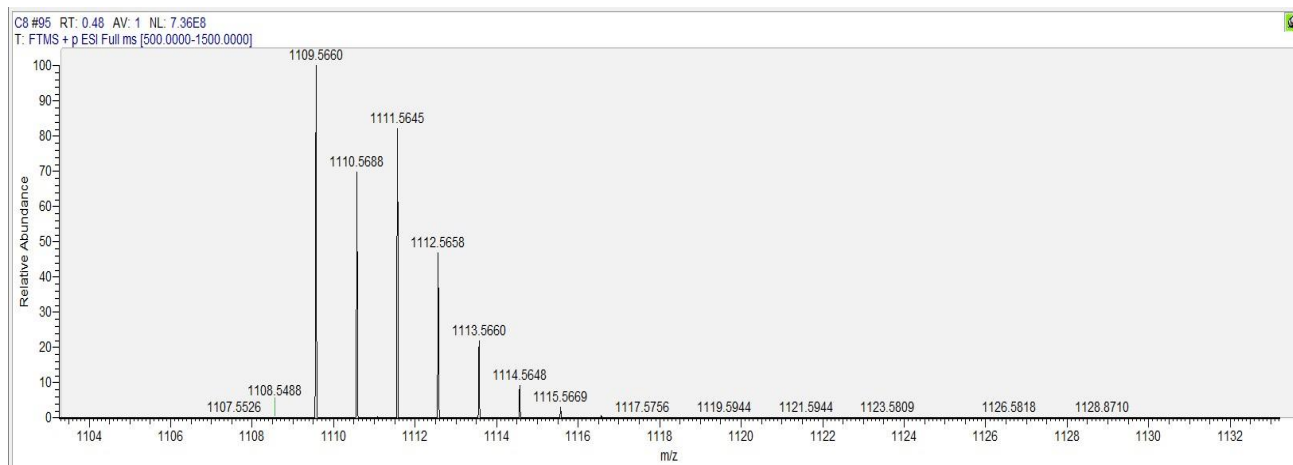

B

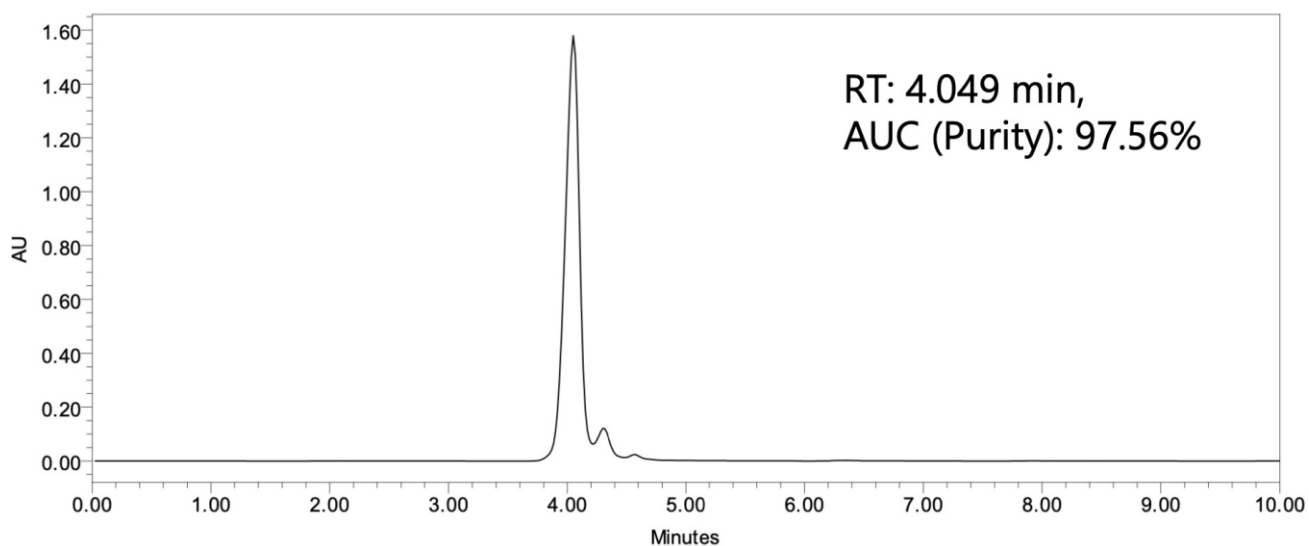

**Figure S25. (A) Mass spectrum of CABI-8. (B) HPLC chromatograph of CABI-8.**
